# Supplementary material for: Bowl-shaped fluorescent liquid crystals derived from 4-tert butyl calix[4]arene and trans cinnamic acid derivatives
Source: Royal Society of Chemistry journal article supplement (doi:10.1039/c9nj03097b), 2019-01-01
Supplement: c9nj03097b1.pdf [file c9nj03097b1.pdf]

## Bowl-shaped Fluorescent Liquid Crystals derived from 4-*tert* butyl calix[4]arene and trans cinnamic acid derivatives

---

Vinay S. Sharma<sup>a\*</sup>, Hemant Kumar Singh<sup>b</sup>, Anuj S. Sharma<sup>c</sup>, Akshara P. Shah<sup>d</sup>, Priyanka A. Shah<sup>c</sup>

<sup>a</sup>: Department of Chemistry, Faculty of Basic and Applied Science, Madhav University, Sirohi, Rajasthan, India.

<sup>b</sup>: Department of Chemistry, Indian Institute of Technology Guwahati, Guwahati-781039, India

<sup>c</sup>: Department of Chemistry, School of Science, Gujarat University, Ahmedabad, Gujarat.

<sup>d</sup>: Department of Chemistry, Mumbai University, Santacruz, Mumbai.

**Email address of corresponding author<sup>\*</sup>**: [vinaysharma3836@gmail.com](mailto:vinaysharma3836@gmail.com)

---

### Contents:

|                                                                                                              |              |
|--------------------------------------------------------------------------------------------------------------|--------------|
| <b>1. Experimental and Characterization.....</b>                                                             | <b>2</b>     |
| <b>2. Synthetic procedure of tert butyl calix[4]arene and derivatives.....</b>                               | <b>3</b>     |
| <b>3. Transition Temperature by POM of Series-1 (1dn-1) and Series-2 (1dn-ll).....</b>                       | <b>7-9</b>   |
| <b>4. DSC data.....</b>                                                                                      | <b>10</b>    |
| <b>5. XRD data.....</b>                                                                                      | <b>11</b>    |
| <b>4. DFT data of comp. 1d<sub>5</sub>-l, 1d<sub>5</sub>-ll, 1d<sub>8</sub>-1 and 1d<sub>8</sub>-ll.....</b> | <b>12-17</b> |
| <b>5. <sup>1</sup>H NMR, <sup>13</sup>C NMR and Mass Spectra.....</b>                                        | <b>18-36</b> |

## 1. Experimental

Melting points were taken on Opti-Melt (Automated melting point system). The FT-IR spectra were recorded as KBr pellet on Shimadzu in the range of 3800-600  $\text{cm}^{-1}$ . Microanalysis was performed on Perkin-Elmer PE 2400 CHN analyser. The texture images were studied on a trinocular optical polarising microscope (POM) equipped with a heating stage.  $^1\text{H}$  NMR spectra and  $^{13}\text{C}$  NMR was recorded on a 400 MHz in Bruker Advance 400 in the range of 0.5 ppm-16 ppm using  $\text{CDCl}_3$  solvent. The phase transition temperatures were measured using Shimadzu DSC-50 at heating and cooling rates of  $10^\circ\text{C min}^{-1}$ . Texture image of nematic phase were determined by miscibility method. Thermo gravimetric analysis (TGA) was performed using a Perkin Elmer-STA 6000 apparatus under high purity nitrogen. The samples were heated from room temperature to  $550^\circ\text{C}$  at  $10^\circ\text{C/min}$ . X-ray diffraction (XRD) measurements were performed on a Rigaku-Ultima IV powder diffractometer equipped with a  $\text{Cu } \alpha$  source ( $\lambda = 1.5418 \text{ \AA}$  and 1.6 kW, X-ray tube with applied voltage and current values as 40 kV and 30 mA power) and also Philips X'PERT MPD.

## 2. Synthesis and characterization

### 2.1 Preparation of *p*-tert-butyl calix[4]arene (1c)

*p*-tert-Butylcalix[4]arene (1c) was synthesized by reported in the literature <sup>[1]</sup>, white precipitates, yield 87%. Elemental analysis:  $\text{C}_{44}\text{H}_{56}\text{O}_4$ : Calcu: C, 80.44; H, 8.70; O, 9.80 %, Found: C, 80.14; H, 8.62; O, 9.72 %.  $^1\text{H}$  NMR: (300 MHz,  $\text{CDCl}_3$ ): 1.18 (s, 36H, t-butyl), 3.48 (d,  $J = 12.0\text{Hz}$ , 4H, Ar- $\text{CH}_2$ -Ar), 4.21 (d,  $J = 12.0\text{Hz}$ , 4H, -Ar $\text{CH}_2$ Ar-), 7.08 (s, 8H, Ar-H), 9.78 (s, 4H, Ar-OH);  $^{13}\text{C}$  NMR: 149.1, 126.2, 126.1 (Ar-C), 34.2 (t-butyl), 31.4 (t-butyl), 32.6 (Ar- $\text{CH}_2$ -Ar).

## 2.2 Preparation of 4-n-alkoxy benzaldehyde (1a)

4-n-alkoxy benzaldehyde (1a) was synthesized by refluxing the mixture of 4-hydroxy benzaldehyde (1 equiv.) with corresponding n-alkyl bromide (R-Br) (1 equiv.) in presence of anhydrous  $K_2CO_3$  (1 equiv.) in dry acetone as a solvent.<sup>2</sup>

## 2.3 Preparation of *Trans* 4-n-alkoxy cinnamic acid (1b)

*Trans* 4-n-alkoxy cinnamic acids are prepared by reported method in literature.<sup>3</sup>

## 2.4 Preparation of 5, 11, 17, 23-tetra-t-butyl-25, 26, 27, 28 tetra n-alkoxy cinnamate calix[4]arene (Series-1):

The compound has been prepared by esterification of the appropriate compound (1b) (0.0015 mol.) and compound (1c) (0.0060 mol.), dicyclohexyl carbodiimide (DCC) (0.0060 mol.) and dimethylaminopyridine (DMAP) in catalytic amount (0.0030 mmol) in dry  $CH_2Cl_2$  (DCM) (30 ml) was stirred at room temperature for 48 h. The white precipitate of DCU is obtained which was isolated by filtration. The resultant crude residue was purified by column chromatography on silica gel eluting with methanol: chloroform as eluent (1:4).<sup>4</sup>

**2.4.1 Preparation of 5, 11, 17, 23-tetra-t-butyl-25, 26, 27, 28 tetra decyloxy cinnamate calix[4]arene (1d<sub>10</sub>-I) (Series-1):** Yield 72%, Elemental analysis:  $C_{120}H_{160}O_{12}$ : Calcu: C, 80.31; H, 8.99; O, 10.70 %. Found: C, 81.68; H, 9.08; O, 10.64 %. FT-IR (KBr) in  $cm^{-1}$ : 3030 (-C-H-Str in aromatic), 1365 and 1240 (-C-O str), 1750 (-COO- group), 960 (-CH=CH- str, trans alkene). <sup>1</sup>H NMR: 1.25 (s, 36H, t-butyl group), 0.88 (t, 12H, -OC<sub>10</sub>H<sub>21</sub>), 1.28 (m, 40H, -OC<sub>10</sub>H<sub>21</sub>), 1.47 (p, 8H, -OC<sub>10</sub>H<sub>21</sub>), 3.21 (d, J = 18.0Hz, 4H, -ArCH<sub>2</sub>Ar-), 4.14 (d, J = 18.0 Hz, 4H, -ArCH<sub>2</sub>Ar-), 3.98 (t, 8H, -OC<sub>10</sub>H<sub>21</sub>), 6.34 (d, J= 15.5 Hz, 4H, -CH=CH-), 7.42 (d, J = 15.5 Hz, 4H, -CH=CH-), 7.21 (d, 8H, Ar-H), 7.67 (s, 8H, Ar-H), 6.86 (s, 8H, Ar-H), 7.68 (d, 2H, Ar-H), 8.01 (d, 4H, Ar-H). <sup>13</sup>C NMR: 161.18, 160.01, 157.90, 147.51, 145.08, 142.06, 132.91,

127.6, 125.3, 121.75, 115.80, 114.8, 34.62, 32.51, 31.92, 14.17, 25.56, 29.30, 29.65. ESI-MS for compound 1d<sub>10</sub>-1 (M+1) Calculated: 1794.19; Found 1795.43.

#### 2.4.2 Preparation of 5, 11, 17, 23-tetra-*t*-butyl-25, 26, 27, 28 tetra dodecyloxy cinnamate

**calix[4]arene (1d<sub>12</sub>-I) (Series-1):** Yield 71%, Elemental analysis: C<sub>128</sub>H<sub>176</sub>O<sub>12</sub>: Calcu: C, 80.63; H, 9.30; O, 10.07 %;. Found: C, 81.32; H, 9.45; O, 10.12 %. FT-IR (KBr) in cm<sup>-1</sup>: 3031 (-C-H-Str in aromatic), 1365 and 1236 (-C-O str), 1740 (-COO- group), 963 (-CH=CH- str, trans alkene). <sup>1</sup>H NMR: 1.24 (s, 36H, *t*-butyl group), 0.88 (t, 12H, -OC<sub>12</sub>H<sub>25</sub>), 1.28 (m, 43H, -OC<sub>12</sub>H<sub>25</sub>), 1.47 (p, 8H, -OC<sub>12</sub>H<sub>25</sub>), 3.51 (d, J = 18.0Hz, 4H, -ArCH<sub>2</sub>Ar-), 4.14 (d, J = 18.0, 4H, -ArCH<sub>2</sub>Ar-), 3.98 (t, 8H, -OC<sub>12</sub>H<sub>25</sub>), 6.34 (d, J = 15.5 Hz, 4H, -CH=CH-), 7.42 (d, J = 15.5 Hz, 4H, -CH=CH-), 8.01 (d, 4H, Ar-H), 7.68 (d, 2H, Ar-H), 7.54 (d, 4H, Ar-H), 7.24 (d, 8H, Ar-H), 6.98 (d, 8H, Ar-H). <sup>13</sup>C NMR: 161.18, 160.01, 157.90, 147.51, 145.08, 142.06, 132.91, 131.82, 129.94, 128.72, 121.75, 115.82, 114.80, 34.62, 32.51, 31.92, 14.1, 22.63, 29.61, 25.96. ESI-MS for compound 1d<sub>12</sub>-1 (M+1) Calculated: 1906.32; Found 1907.53.

#### 2.4.3 Preparation of 5, 11, 17, 23-tetra-*t*-butyl-25, 26, 27, 28 tetra octyloxy cinnamate

**calix[4]arene (1d<sub>8</sub>-I) (Series-1):** Yield 69%, Elemental analysis: C<sub>112</sub>H<sub>144</sub>O<sub>12</sub>: Calcu: C, 79.96; H, 8.63; O, 11.41 %. Found: C, 79.57; H, 9.02; O, 11.37 %. FT-IR (KBr) in cm<sup>-1</sup>: 3029 (-C-H-Str in aromatic), 1361 and 1240 (-C-O str), 1760 (-COO- group), 941 (-CH=CH- str, trans alkene). <sup>1</sup>H NMR: 1.24 (s, 36H, *t*-butyl group), 0.86 (t, 12H, -OC<sub>8</sub>H<sub>17</sub>), 1.28 (m, 24H, -OC<sub>8</sub>H<sub>17</sub>), 1.46 (p, 8H, -OC<sub>8</sub>H<sub>17</sub>), 3.51 (d, J = 18.0Hz, 4H, -ArCH<sub>2</sub>Ar-), 4.14 (d, J = 18.0, 4H, -ArCH<sub>2</sub>Ar-), 3.98 (t, 8H, -OC<sub>8</sub>H<sub>17</sub>), 6.34 (d, J = 15.5 Hz, 4H, -CH=CH-), 8.01 (d, 4H, Ar-H), 7.68 (d, 2H, Ar-H), 7.42 (d, J = 15.5 Hz, 4H, -CH=CH-), 7.84 (d, 4H, Ar-H), 7.24 (d, 8H, Ar-H), 7.01 (s, 4H, Ar-H), 6.98 (d, 8H, Ar-H). <sup>13</sup>C NMR: 161.18, 160.01, 157.90, 147.51, 145.08, 142.06, 132.91,

131.82, 129.94, 128.72, 121.75, 115.82, 114.80, 34.62, 32.51, 31.92, 31.32, 14.41, 22.61, 25.56, 29.61, 27.62, 25.96. ESI-MS for compound 1d<sub>8</sub>-1 (M+1) Calculated: 1682.07; Found 1683.12.

#### **2.4.4 Preparation of 5, 11, 17, 23-tetra-*t*-butyl-25, 26, 27, 28 tetra pentyloxy cinnamate**

**calix[4]arene (1d<sub>5</sub>-I) (Series-1):** Yield 74%, Elemental analysis: C<sub>100</sub>H<sub>120</sub>O<sub>12</sub>: Calcu: C, 79.33; H, 7.99; O, 12.68 %. Found: C, 79.26; H, 7.83; O, 12.59 %. FT-IR (KBr) in cm<sup>-1</sup>: 3020 (-C-H-Str in aromatic), 1361 and 1246 (-C-O str), 1760 (-COO- group), 961 (-CH=CH- str, trans alkene). <sup>1</sup>H NMR: 1.24 (s, 36H, *t*-butyl group), 0.86 (t, 12H, -OC<sub>5</sub>H<sub>11</sub>), 1.28 (m, 13H, -OC<sub>5</sub>H<sub>11</sub>), 1.47 (p, 8H, -OC<sub>5</sub>H<sub>11</sub>), 3.51 (d, J = 18.0Hz, 4H, -ArCH<sub>2</sub>Ar-), 4.14 (d, J = 18.0, 4H, -ArCH<sub>2</sub>Ar-), 3.98 (t, 8H, -OC<sub>5</sub>H<sub>11</sub>), 6.24 (d, J = 15.5 Hz, 4H, -CH=CH-), 7.43 (d, J = 15.5 Hz, 4H, -CH=CH-), 8.01 (d, 4H, Ar-H), 7.78 (d, 2H, Ar-H), 7.24 (d, 8H, Ar-H), 7.01 (s, 4H, Ar-H), 6.98 (d, 8H, Ar-H). <sup>13</sup>C NMR: 161.12, 160.01, 157.90, 147.51, 145.08, 142.06, 132.91, 131.82, 129.94, 128.72, 121.75, 115.82, 114.80, 34.62, 32.51, 31.92, 14.14, 22.13, 29.61, 27.72, 25.16. ESI-MS for compound 1d<sub>5</sub>-1 (M+1) Calculated: 1513.88; Found 1514.13.

#### **2.4.5 Preparation of 5, 11, 17, 23-tetra-*t*-butyl-25, 26, 27, 28 tetra butyloxy cinnamate**

**calix[4]arene (1d<sub>4</sub>-I) (Series-1):** Yield 74%, Elemental analysis: C<sub>96</sub>H<sub>112</sub>O<sub>12</sub>: Calcu: C, 79.09; H, 7.74; O, 13.17 %. Found: C, 78.86; H, 7.87; O, 13.34 %. FT-IR (KBr) in cm<sup>-1</sup>: 3020 (-C-H-Str in aromatic), 1361 and 1246 (-C-O str), 1760 (-COO- group), 948 (-CH=CH- str, trans alkene). <sup>1</sup>H NMR: 1.24 (s, 36H, *t*-butyl group), 0.86 (t, 12H, -OC<sub>4</sub>H<sub>9</sub>), 1.75 (sext, 8H, -OC<sub>4</sub>H<sub>9</sub>), 1.47 (p, 8H, -OC<sub>4</sub>H<sub>9</sub>), 3.51 (d, J = 18.0Hz, 4H, -ArCH<sub>2</sub>Ar-), 4.14 (d, J = 18.0, 4H, -ArCH<sub>2</sub>Ar-), 3.98 (t, 8H, -OC<sub>4</sub>H<sub>9</sub>), 6.24 (d, J = 15.5 Hz, 4H, -CH=CH-), 7.42 (d, J = 15.5 Hz, 4H, -CH=CH-), 8.01 (d, 4H, Ar-H), 7.84 (d, 8H, Ar-H), 7.01 (d, 4H, Ar-H), 6.87 (d, 8H, Ar-H), 7.32 (d, 4H, Ar-H). <sup>13</sup>C NMR: 161.18, 160.01, 157.90, 147.51, 145.08, 142.06, 132.91, 131.82, 129.94, 128.72,

121.75, 115.82, 114.80, 34.62, 32.51, 31.92, 29.61, 29.30, 27.72, 25.96, 14.13. ESI-MS for compound 1d<sub>4</sub>-1 (M+1) Calculated: 1457.82; Found 1458.63.

## **2.5 Preparation of 5, 11, 17, 23-tetra-*t*-butyl-25, 28 di-*n*-alkoxy cinnamate calix[4]arene (Series-2):**

The compound has been prepared by esterification of the appropriate compound (1a) (0.0015 mol.) and compound (1c) (0.0030 mol.), dicyclohexyl carbodiimide (DCC) (0.0030 mol.) and dimethylaminopyridine (DMAP) in catalytic amount (0.0015 mmol) in dry CH<sub>2</sub>Cl<sub>2</sub> (DCM) (30 ml) was stirred at room temperature for 48 h. The white precipitate of DCU is obtained which was isolated by filtration. The resultant crude residue was purified by column chromatography on silica gel eluting with methanol: chloroform as eluent (1:4) [4].

### **2.5.1 Preparation of 5, 11, 17, 23-tetra-*t*-butyl-25, 28 di-decyloxy cinnamate calix[4]arene**

**(1d<sub>10</sub>-II) (Series-2):** Yield 72 %, Elemental analysis: C<sub>82</sub>H<sub>108</sub>O<sub>8</sub>: Calcu: C, 80.61; H, 8.91; O, 10.48 %. Found: C, 80.84; H, 9.15; O, 10.34 %. FT-IR (KBr) in cm<sup>-1</sup>: 2950 (-C-H- Str in aromatic), 3450 (-OH), 1361 and 1240 (-C-O str), 1760 (-COO- group), 961 (-CH=CH- str, trans alkene). <sup>1</sup>H NMR: 1.24 (s, 36H, *t*-butyl group), 0.88 (t, 6H, -OC<sub>10</sub>H<sub>21</sub>), 1.28 (m, 20H, -OC<sub>10</sub>H<sub>21</sub>), 1.46 (p, 4H, -OC<sub>10</sub>H<sub>21</sub>), 3.56 (d, *J* = 15.0 Hz, 4H, -ArCH<sub>2</sub>Ar-), 4.14 (d, *J* = 15.0 Hz, 4H, -ArCH<sub>2</sub>Ar-), 3.98 (t, 4H, -OC<sub>10</sub>H<sub>21</sub>), 6.29 (d, *J* = 15.5 Hz, 4H, -OC<sub>10</sub>H<sub>21</sub>), 7.52 (d, *J* = 15.5 Hz), 9.02 (s, 2H, Ar-OH), 8.04 (d, 4H, Ar-H), 7.56 (s, 2H, Ar-H), 7.31 (s, 2H, Ar-H), 7.4 (s, 4H, Ar-H), 6.94 (d, 2H, Ar-H), 6.83 (d, 2H, Ar-H). <sup>13</sup>C NMR: 161.12, 160.01, 157.90, 147.51, 145.08, 142.06, 132.91, 131.82, 129.94, 128.72, 121.75, 115.82, 114.80, 34.62, 32.51, 31.92, 22.13, 29.61, 27.72, 25.16, 14.08. ESI-MS for compound 1d<sub>10</sub>-11 (M+1) Calculated: 1220.80; Found 1221.04.

### 2.5.2 Preparation of 5, 11, 17, 23-tetra-*t*-butyl-25, 28 di-dodecyloxy cinnamate calix[4]arene

**(1d<sub>12</sub>-II) (Series-2):** Yield 69 %, Elemental analysis: C<sub>86</sub>H<sub>116</sub>O<sub>8</sub>: Calcu: C, 80.83; H, 9.15; O, 10.02 %. Found: C, 80.98; H, 9.23; O, 10.14 %. FT-IR (KBr) in cm<sup>-1</sup>: 2941 (-C-H- Str in aromatic), 3450 (-OH), 1361 and 1260 (-C-O str), 1750 (-COO- group), 953 (-CH=CH- str, trans alkene). <sup>1</sup>H NMR: 1.24 (s, 36H, *t*-butyl group), 0.86 (t, 6H, -OC<sub>12</sub>H<sub>25</sub>), 1.28 (m, 18H, -OC<sub>12</sub>H<sub>25</sub>), 1.47 (p, 4H, -OC<sub>12</sub>H<sub>25</sub>), 3.56 (d, *J* = 15.0Hz, 4H, -ArCH<sub>2</sub>Ar-), 4.14 (d, *J* = 15.0 Hz, 4H, -ArCH<sub>2</sub>Ar-), 3.98 (t, 4H, -OC<sub>12</sub>H<sub>25</sub>), 6.27 (d, *J* = 15.5 Hz, 2H, -CH=CH-), 7.52 (d, *J* = 15.5 Hz, 2H, -CH=CH-), 9.04 (s, 2H, Ar-OH), 8.01 (d, 4H, Ar-H), 7.56 (s, 2H, Ar-H), 7.03 (s, 4H, Ar-H), 6.98 (d, 2H, Ar-H), 6.83 (d, 2H, Ar-H), 7.31 (s, 2H, Ar-H). <sup>13</sup>C NMR: 161.12, 160.01, 157.90, 147.51, 145.08, 142.06, 132.91, 131.82, 129.94, 128.72, 121.75, 115.82, 114.80, 34.62, 32.51, 31.92, 14.14, 22.13, 29.61, 27.72, 25.16. ESI-MS for compound 1d<sub>12</sub>-II (M+1) Calculated: 1276.87; Found 1277.21.

### 2.5.2 Preparation of 5, 11, 17, 23-tetra-*t*-butyl-25, 28 di-octyloxy cinnamate calix[4]arene

**(1d<sub>8</sub>-II) (Series-2):** Yield 64 %, Elemental analysis: C<sub>78</sub>H<sub>100</sub>O<sub>8</sub>: Calcu: C, 80.37; H, 8.65; O, 10.98 %. Found: C, 80.46; H, 8.61; O, 11.09 %. FT-IR (KBr) in cm<sup>-1</sup>: 2947 (-C-H- Str in aromatic), 3451 (-OH), 1343 and 1250 (-C-O str), 1760 (-COO- group), 947 (-CH=CH- str, trans alkene). <sup>1</sup>H NMR: 1.24 (s, 36H, *t*-butyl group), 0.88 (t, 6H, -OC<sub>8</sub>H<sub>17</sub>), 1.28 (m, 12H, -OC<sub>8</sub>H<sub>17</sub>), 1.47 (p, 4H, -OC<sub>8</sub>H<sub>17</sub>), 3.51 (d, *J* = 15.0Hz, 4H, -ArCH<sub>2</sub>Ar-), 4.14 (d, *J* = 15.0 Hz, 4H, -ArCH<sub>2</sub>Ar-), 3.98 (t, 4H, -OC<sub>8</sub>H<sub>17</sub>), 6.41 (d, *J* = 15.5 Hz, 4H, -OC<sub>8</sub>H<sub>17</sub>), 7.53 (d, *J* = 15.5 Hz), 9.01 (s, 2H, Ar-OH), 8.02 (d, 4H, Ar-H), 7.49 (s, 4H, Ar-H), 7.26 (s, 2H, Ar-H), 7.01 (d, 4H, Ar-H), 6.72 (s, 2H, Ar-H). <sup>13</sup>C NMR: 161.12, 160.01, 157.90, 147.51, 145.08, 142.06, 132.91, 131.82, 129.14, 128.72, 121.75, 115.82, 114.80, 34.62, 32.51, 31.92, 14.14, 22.13, 29.63, 27.72, 25.16. ESI-MS for compound 1d<sub>8</sub>-II (M+1) Calculated: 1164.74; Found 1165.56.

### 2.5.2 Preparation of 5, 11, 17, 23-tetra-*t*-butyl-25, 28 di-pentyloxy cinnamate calix[4]arene

**(1d<sub>5</sub>-II) (Series-2):** Yield 67 %, Elemental analysis: C<sub>72</sub>H<sub>88</sub>O<sub>8</sub>: Calcu: C, 79.96; H, 8.04; O, 12.15 %. Found: C, 79.91; H, 7.94; O, 12.09 %. FT-IR (KBr) in cm<sup>-1</sup>: 2940 (-C-H- Str in aromatic), 3456 (-OH), 1343 and 1240 (-C-O str), 1760 (-COO- group), 961 (-CH=CH- str, trans alkene). <sup>1</sup>H NMR: 1.24 (s, 36H, *t*-butyl group), 0.88 (t, 6H, -OC<sub>6</sub>H<sub>13</sub>), 1.28 (m, 8H, -OC<sub>5</sub>H<sub>11</sub>), 1.47 (p, 4H, -OC<sub>5</sub>H<sub>11</sub>), 3.54 (d, *J* = 15.0Hz, 4H, -ArCH<sub>2</sub>Ar-), 4.14 ( d, *J* = 15.0 Hz, 4H, -ArCH<sub>2</sub>Ar-), 3.97 (t, 4H, -OC<sub>5</sub>H<sub>11</sub>), 6.27 (d, *J* = 15.5 Hz, 4H, -CH=CH-), 7.52 (d, *J* = 15.5 Hz, -CH=CH-), 9.03 (s, 2H, Ar-OH), 8.03 (d, 4H, Ar-H), 7.25 (d, 4H, Ar-H), 7.18 (s, 2H, Ar-H), 6.81 (s, 4H, Ar-H). <sup>13</sup>C NMR: 161.18, 160.01, 157.90, 147.51, 145.08, 142.06, 132.91, 131.82, 129.94, 128.72, 121.75, 115.82, 114.80, 34.62, 32.51, 31.92, 22.13, 29.61, 27.72, 25.06, 14.13. ESI-MS for compound 1d<sub>5</sub>-II (M+1) Calculated: 1080.65; Found 1081.17.

### 2.5.3 Preparation of 5, 11, 17, 23-tetra-*t*-butyl-25, 28 di-butyloxy cinnamate calix[4]arene

**(1d<sub>4</sub>-II) (Series-2):** Yield 67 %, Elemental analysis: C<sub>70</sub>H<sub>84</sub>O<sub>8</sub>: Calcu: C, 79.81; H, 8.04; O, 12.15 %. Found: C, 79.76; H, 7.95; O, 12.21 %. FT-IR (KBr) in cm<sup>-1</sup>: 2940 (-C-H- Str in aromatic), 3456 (-OH), 1343 and 1240 (-C-O str), 1760 (-COO- group), 961 (-CH=CH- str, trans alkene). <sup>1</sup>H NMR: 1.24 (s, 36H, *t*-butyl group), 0.88 (t, 6H, -OC<sub>4</sub>H<sub>9</sub>), 1.75 (sext, 4H, -OC<sub>4</sub>H<sub>9</sub>), 1.47 (p, 4H, -OC<sub>4</sub>H<sub>9</sub>), 3.52 (d, *J* = 15.0Hz, 4H, -ArCH<sub>2</sub>Ar-), 4.14 ( d, *J* = 15.0 Hz, 4H, -ArCH<sub>2</sub>Ar-), 3.98 (t, 4H, -OC<sub>4</sub>H<sub>9</sub>), 6.49 (d, *J* = 15.5 Hz, 4H, -CH=CH-), 7.51 (d, *J* = 15.5 Hz, -CH=CH-), 9.03 (s, 2H, Ar-OH), 8.03 (d, 4H, Ar-H), 7.58 (s, 2H, Ar-H), 7.21 (d, 4H, Ar-H), 6.73 (s, 4H, Ar-H). <sup>13</sup>C NMR: 161.12, 160.01, 157.90, 147.51, 145.08, 142.06, 132.91, 131.82, 129.94, 128.72, 121.75, 115.82, 114.80, 34.62, 32.51, 31.92, 22.13, 29.61, 27.72, 25.16, 14.14. ESI-MS for compound 1d<sub>4</sub>-II (M+1) Calculated: 1052.62; Found 1053.64.



**Table S<sub>1</sub>**:- Transition Temperature in °C by POM (**1d<sub>n</sub>-I**, Series-1)

| Sr.no | R= n-alkyl group         | Transition temperatures in °C |       |       |       |
|-------|--------------------------|-------------------------------|-------|-------|-------|
|       |                          | SmC                           | SmA   | N     | I     |
| 1     | <b>1d<sub>4</sub>-I</b>  | 112.0                         | 146.0 | -     | 168.0 |
| 2     | <b>1d<sub>5</sub>-I</b>  | 103.0                         | 134.0 | -     | 158.0 |
| 3     | <b>1d<sub>8</sub>-I</b>  | 107.0                         | 116.0 | -     | 131.0 |
| 4     | <b>1d<sub>10</sub>-I</b> | 96.0                          | -     | 110.0 | 128.0 |
| 5     | <b>1d<sub>12</sub>-I</b> | 84.0                          | -     | 104.0 | 121.0 |
| 6     | <b>1d<sub>14</sub>-I</b> | -                             | -     | 81.0  | 116.4 |

(Cr = solid crystal; Sm C = smectic C phase; SmA = smectic A phase; N = nematic phase; I = isotropic phase).

**Table S<sub>2</sub>**:- Transition Temperature in °C by POM (**1d<sub>n</sub>-II**, Series-2)

| Sr.no | R= n-alkyl group          | Transition temperatures in °C |       |       |       |
|-------|---------------------------|-------------------------------|-------|-------|-------|
|       |                           | SmC                           | SmA   | N     | I     |
| 1     | <b>1d<sub>4</sub>-II</b>  | 123.0                         | -     | -     | 168.0 |
| 2     | <b>1d<sub>5</sub>-II</b>  | 121.0                         | 152.0 | -     | 162.0 |
| 3     | <b>1d<sub>8</sub>-II</b>  | 115.0                         | 130.0 | -     | 133.0 |
| 4     | <b>1d<sub>10</sub>-II</b> | 109.0                         | 127.0 | -     | 143.0 |
| 5     | <b>1d<sub>12</sub>-II</b> | 101.0                         | -     | 116.0 | 131.0 |
| 6     | <b>1d<sub>14</sub>-II</b> | 96.0                          | -     | 114.0 | 129.0 |

(Cr = solid crystal; Sm C = smectic C phase; SmA = smectic A phase; N = nematic phase; I = isotropic phase).

**Table S<sub>3</sub>**:- Transition Temperature in °C by POM (**1b<sub>4</sub>-1b<sub>14</sub>**)

| Comp.           | Structure                                                                           | Transition temperature in °C |       |       |
|-----------------|-------------------------------------------------------------------------------------|------------------------------|-------|-------|
|                 |                                                                                     | Sm                           | N     | I     |
| 1b <sub>4</sub> | 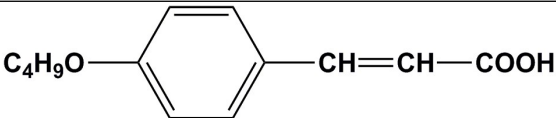 | -                            | 156.0 | 189.0 |
| 1b <sub>5</sub> |  | -                            | 144.0 | 180.0 |
| 1b <sub>8</sub> |  | -                            | 145.0 | 172.0 |

|                  |                                      |       |       |       |
|------------------|--------------------------------------|-------|-------|-------|
| 1b <sub>10</sub> | <chem>C10H21O-C6H4-CH=CH-COOH</chem> | 136.0 | 150.0 | 169.0 |
| 1b <sub>12</sub> | <chem>C12H25O-C6H4-CH=CH-COOH</chem> | 132.0 | 157.0 | 164.0 |
| 1b <sub>14</sub> | <chem>C14H29O-C6H4-CH=CH-COOH</chem> | 127.0 | -     | 160.0 |

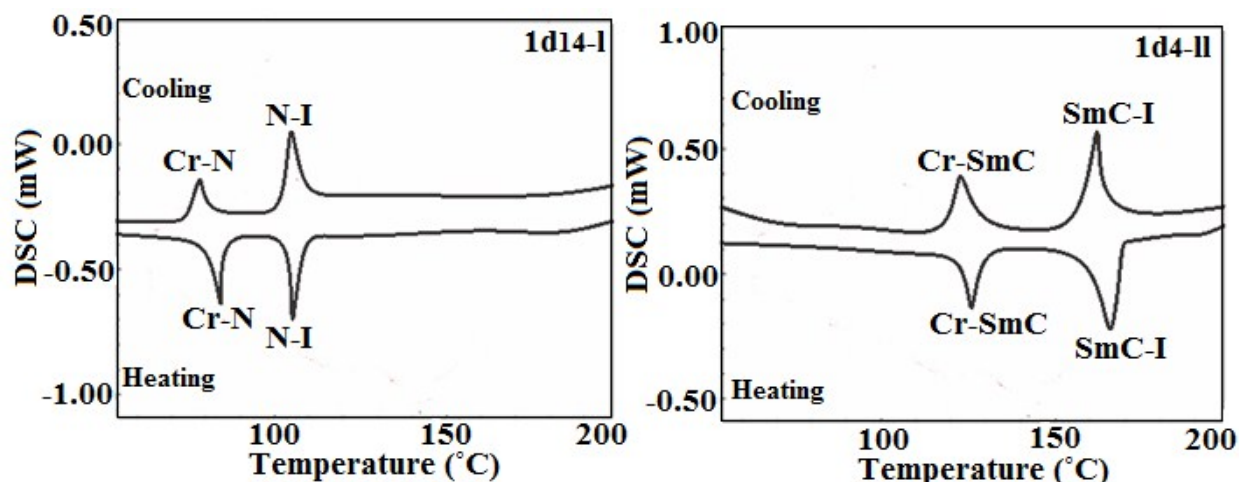

**Figure S<sub>1</sub>:** The DSC traces of compounds **1d<sub>14</sub>-I** (a), **1d<sub>4</sub>-I** (b) on first heating and cooling (scan rate 10°C/min).

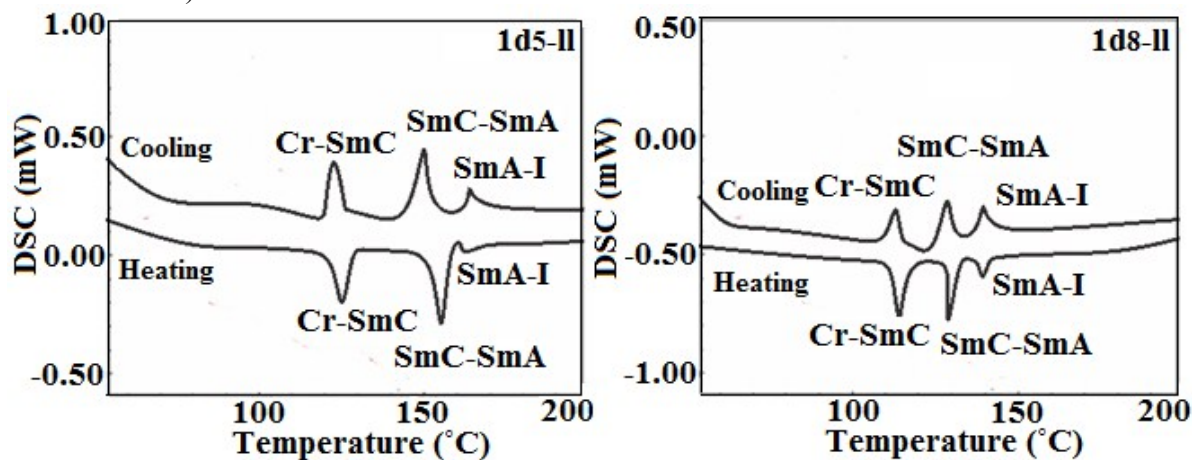

**Figure S<sub>2</sub>:** The DSC traces of compounds **1d<sub>5</sub>-II** (a), **1d<sub>8</sub>-II** (b) on first heating and cooling (scan rate 10°C/min).

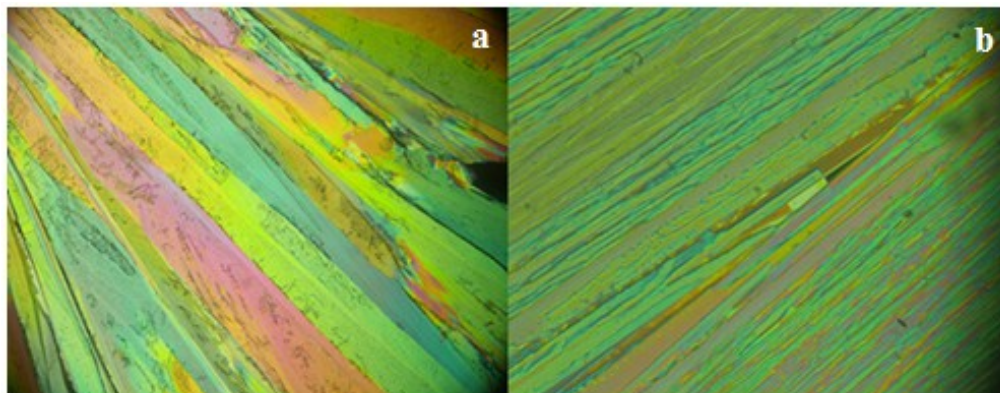

**Figure S3:** Photomicrographs of the texture obtained for series-1 and series-2: (a) fan type texture image of SmA phase at 134 °C for comp. **1d<sub>5</sub>-I**; (b) threaded line type texture image of SmA phase at 130 °C for comp. **1d<sub>8</sub>-II**.

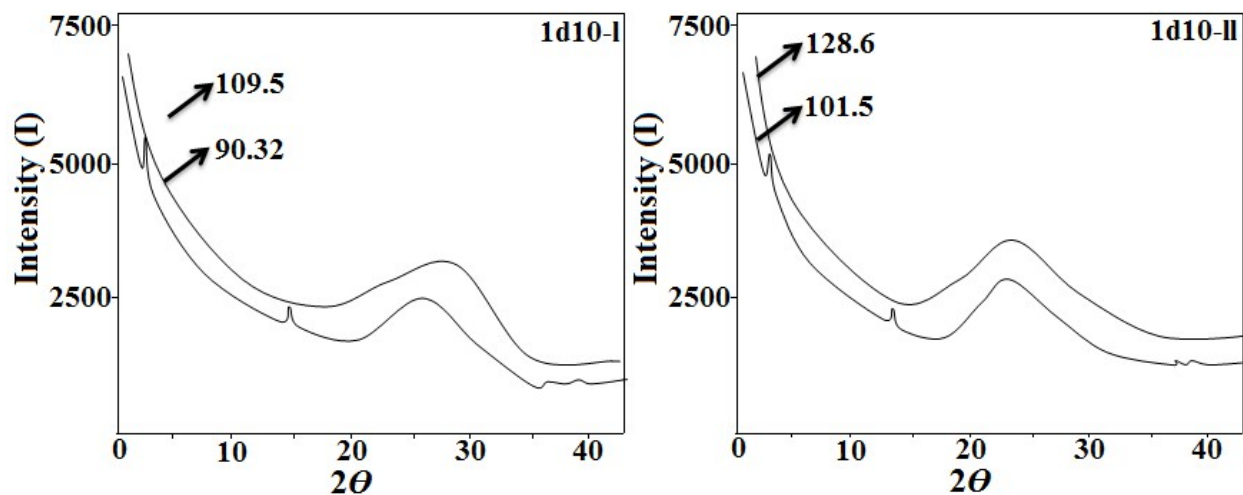

**Figure S4:** XRD patterns of (a) Compound **1d<sub>10</sub>-I** (series-1) at 109.5 °C and 90.32 °C; (b) Compound **1d<sub>10</sub>-II** (series-2) at 128.6 °C and 101.5 °C.

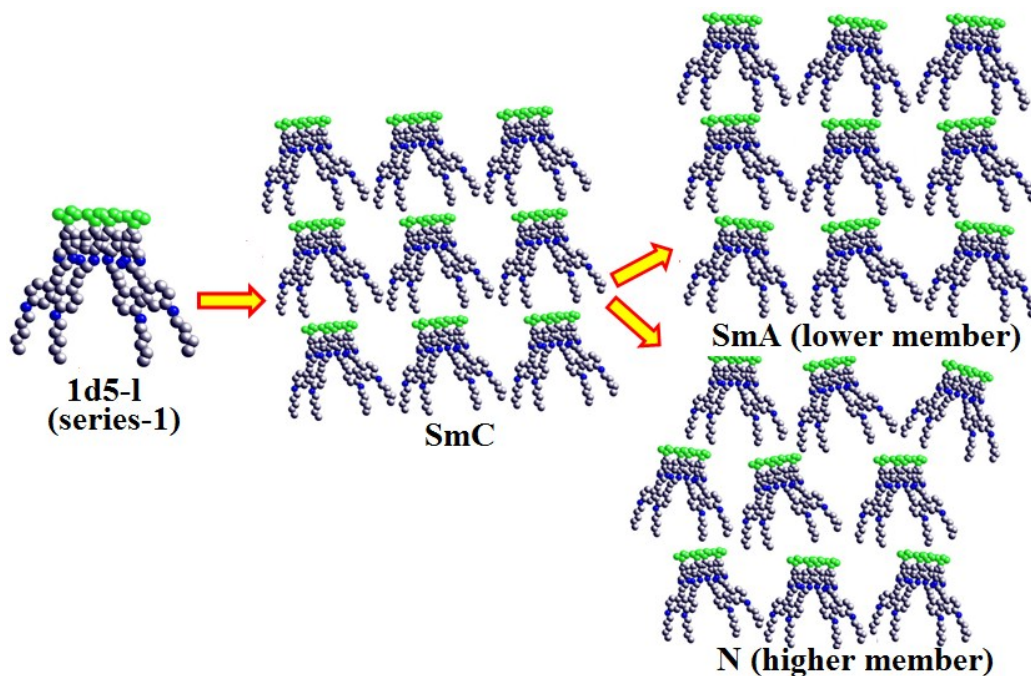

**Figure S<sub>5</sub>:** Schematic representation of liquid crystal molecule self-assembled in the mesophase arrangement in Series-1 (1dn-1).

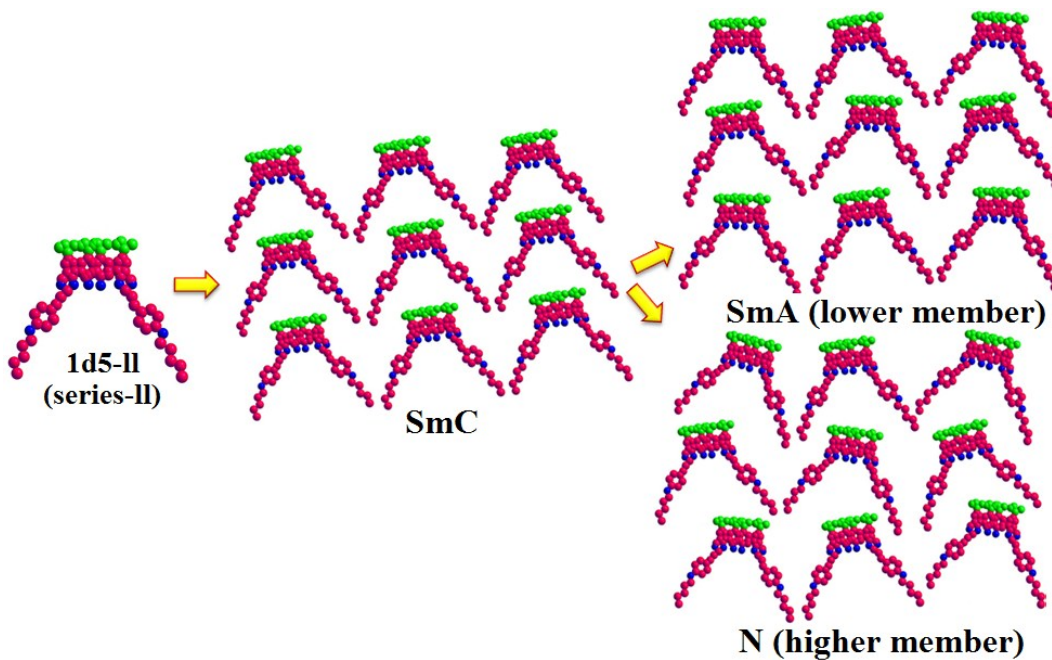

**Figure S<sub>6</sub>:** Schematic representation of liquid crystal molecule self-assembled in the mesophase arrangement in Series-2 (1dn-II).

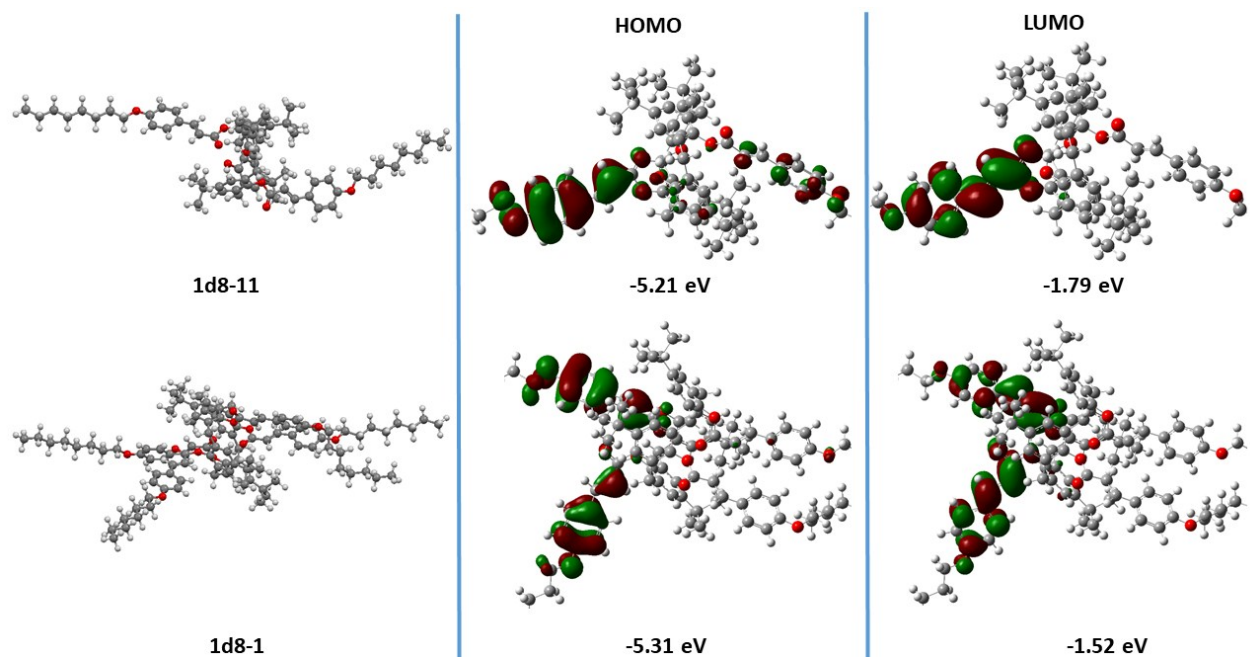

**Figure S7:** Optimized geometry and HOMO and LUMO frontier molecular orbitals of the compounds **1d8-1** and **1d8-11** at the B3LYP/6-31G (dp) level (some part of alkyl chain is omitted for clear view in HOMO and LUMO orbitals).

**Table S4:** Frontier molecular orbitals of comp. **1d<sub>5</sub>-I**, **1d<sub>5</sub>-II**, **1d<sub>8</sub>-I** and **1d<sub>8</sub>-II** at the B3LYP/6-31G (dp) level.

| <b>1d<sub>5</sub>-I</b> | <b>Orbital Energy</b> | <b>Orbital diagram</b>                                                               |
|-------------------------|-----------------------|--------------------------------------------------------------------------------------|
| <b>LUMO+1</b>           | -1.49 eV              | 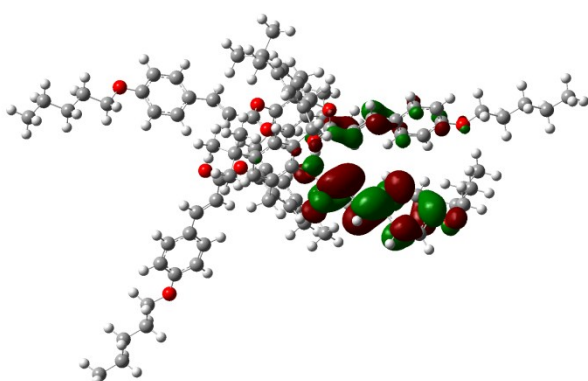   |
| <b>LUMO</b>             | -1.52 eV              |   |
| <b>HOMO</b>             | -5.32 eV              |  |

|               |          |                                                                                    |
|---------------|----------|------------------------------------------------------------------------------------|
| <b>HOMO-1</b> | -5.42 eV | 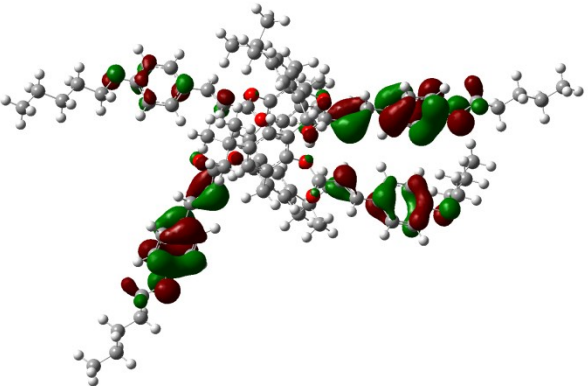 |
|---------------|----------|------------------------------------------------------------------------------------|

| <b>1d<sub>g</sub>-II</b> | <b>Orbital Energy</b> | <b>Orbital diagram</b>                                                               |
|--------------------------|-----------------------|--------------------------------------------------------------------------------------|
| <b>LUMO+1</b>            | -1.46 eV              | 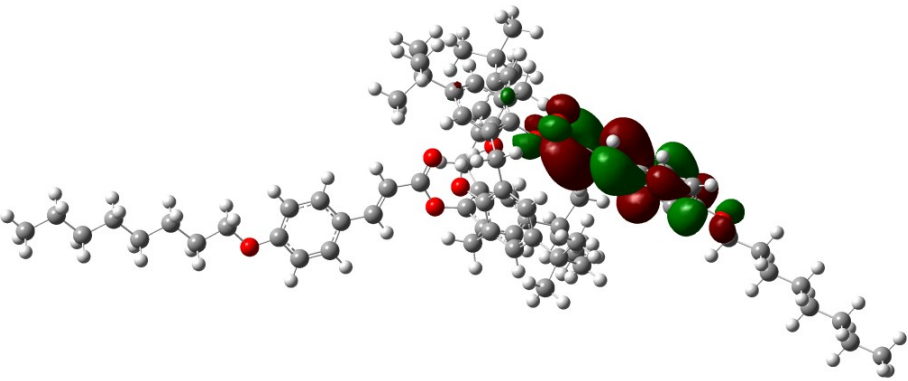  |
| <b>LUMO</b>              | -1.79 eV              |  |

|               |          |                                                                                    |
|---------------|----------|------------------------------------------------------------------------------------|
| <b>HOMO</b>   | -5.21 eV | 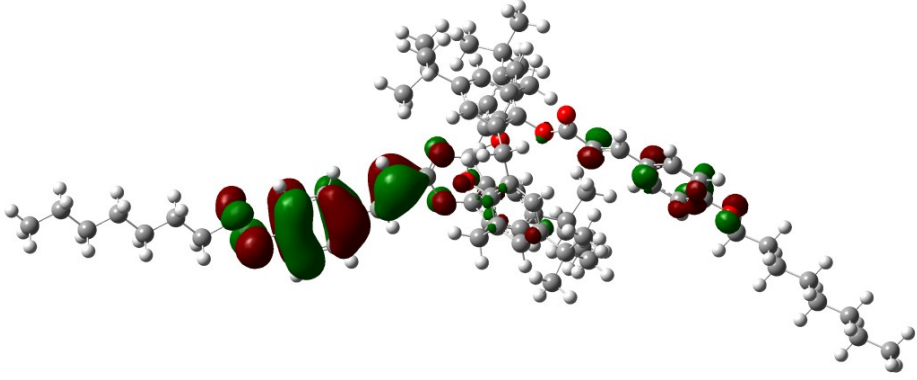 |
| <b>HOMO-1</b> | -5.28 eV |  |



| <b>1d<sub>g</sub>-1</b> | <b>Orbital Energy</b> | <b>Orbital diagram</b>                                                               |
|-------------------------|-----------------------|--------------------------------------------------------------------------------------|
| <b>LUMO+1</b>           | -1.48 eV              | 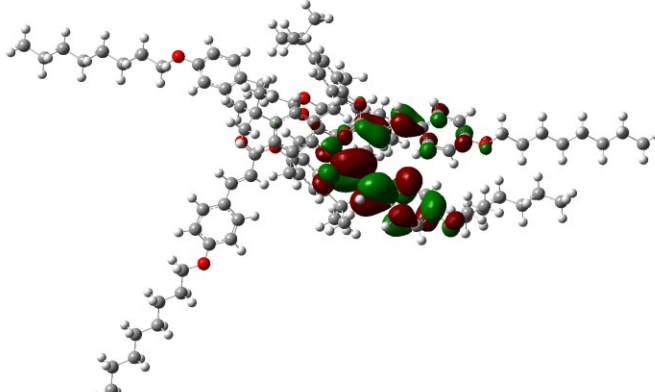   |
| <b>LUMO</b>             | -1.52 eV              |   |
| <b>HOMO</b>             | -5.31 eV              |  |

|        |          |                                                                                    |
|--------|----------|------------------------------------------------------------------------------------|
| HOMO-1 | -5.42 eV | 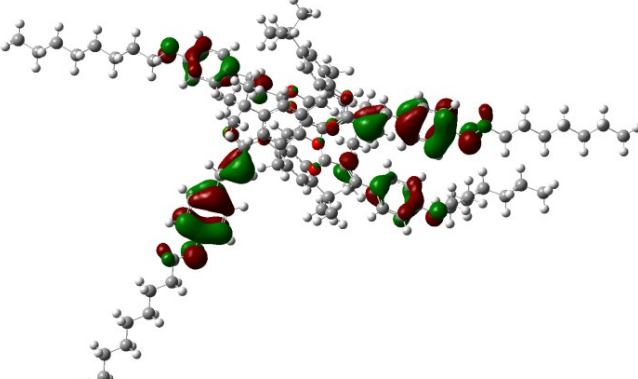 |
|--------|----------|------------------------------------------------------------------------------------|

**Table S<sub>5</sub>:** Molecular electrostatic potential (MEP) diagram of comp.**1d<sub>5</sub>-II**, **1d<sub>8</sub>-II** (series-2) and comp.**1d<sub>5</sub>-I**,**1d<sub>8</sub>-I** (series-1).

|                     |                                                                                      |
|---------------------|--------------------------------------------------------------------------------------|
| 1d <sub>5</sub> -II | 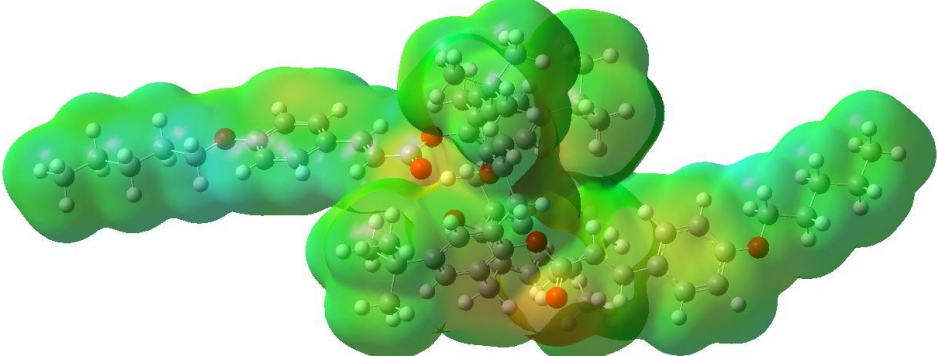  |
| 1d <sub>5</sub> -I  |  |

|                          |                                                                                     |
|--------------------------|-------------------------------------------------------------------------------------|
| <b>1d<sub>g</sub>-II</b> | 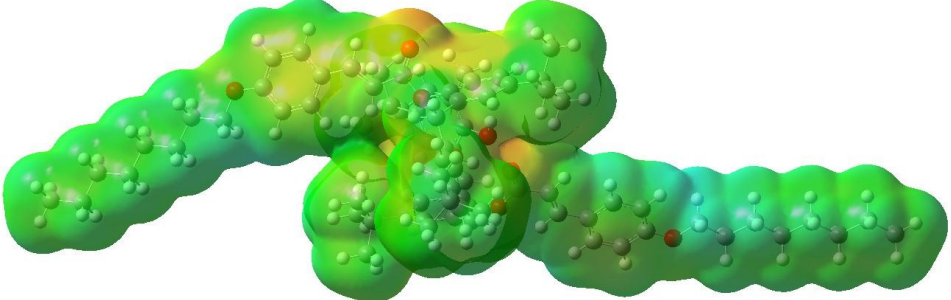  |
| <b>1d<sub>g</sub>-I</b>  |  |

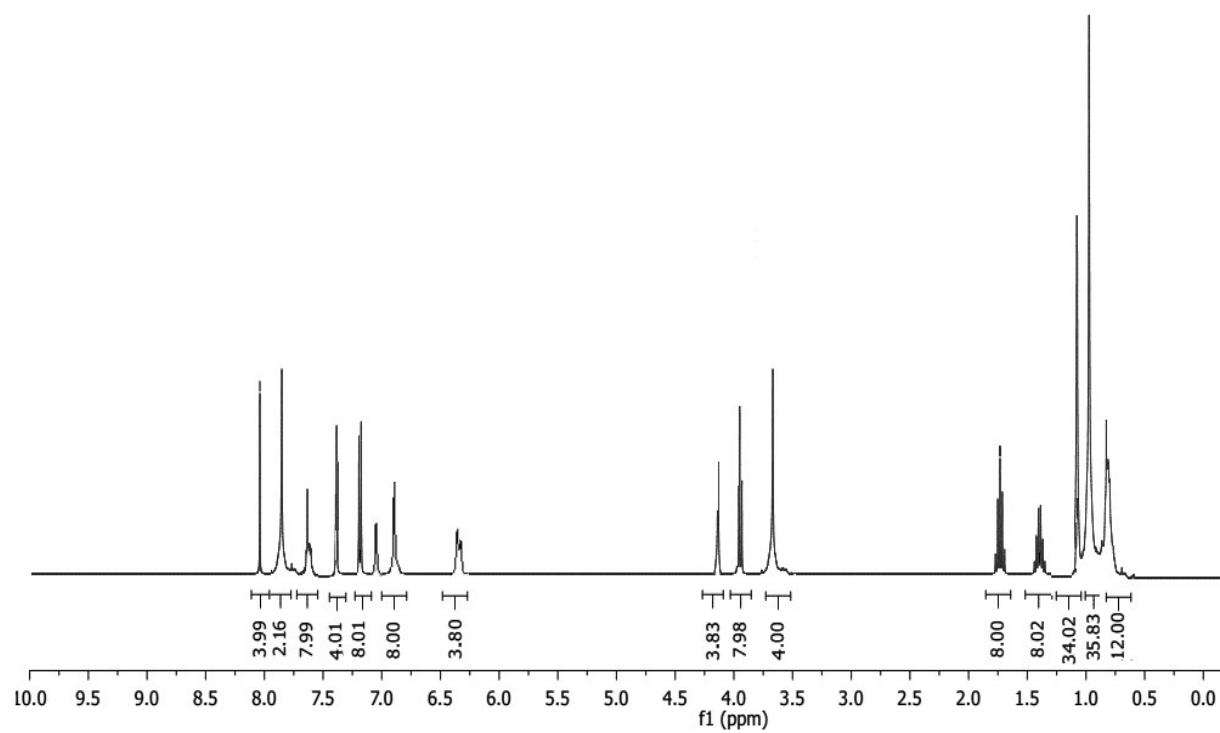

**Figure S<sub>8</sub>:** <sup>1</sup>H NMR of compound 1d<sub>10</sub>-1 (series-1)

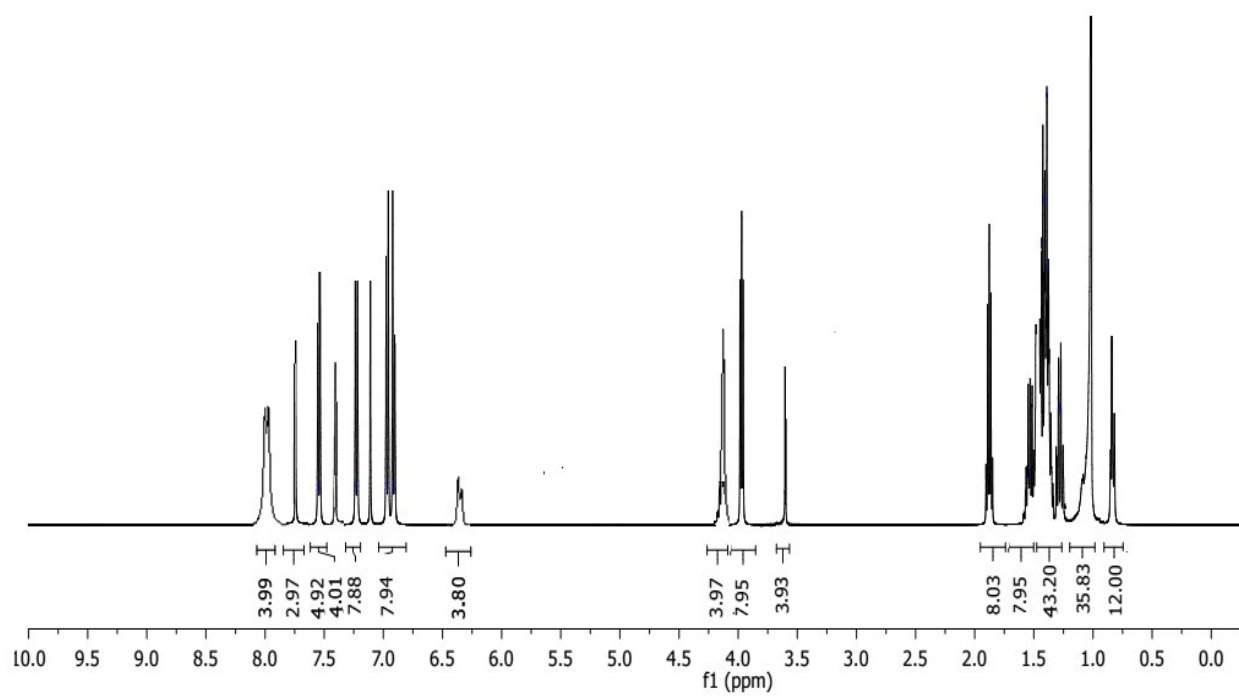

**Figure S<sub>9</sub>:** <sup>1</sup>H NMR of compound 1d<sub>12</sub>-1 (series-1)

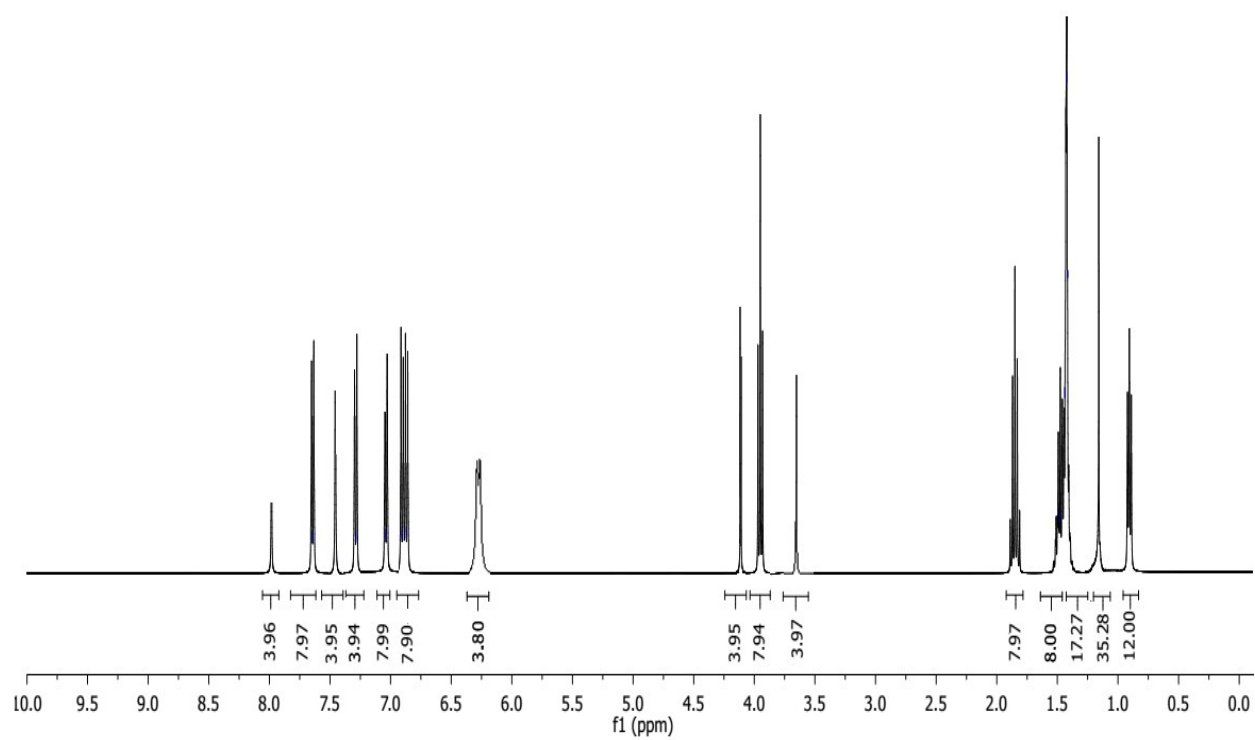

**Figure S<sub>10</sub>:** <sup>1</sup>H NMR of compound 1d<sub>8</sub>-1 (series-1)

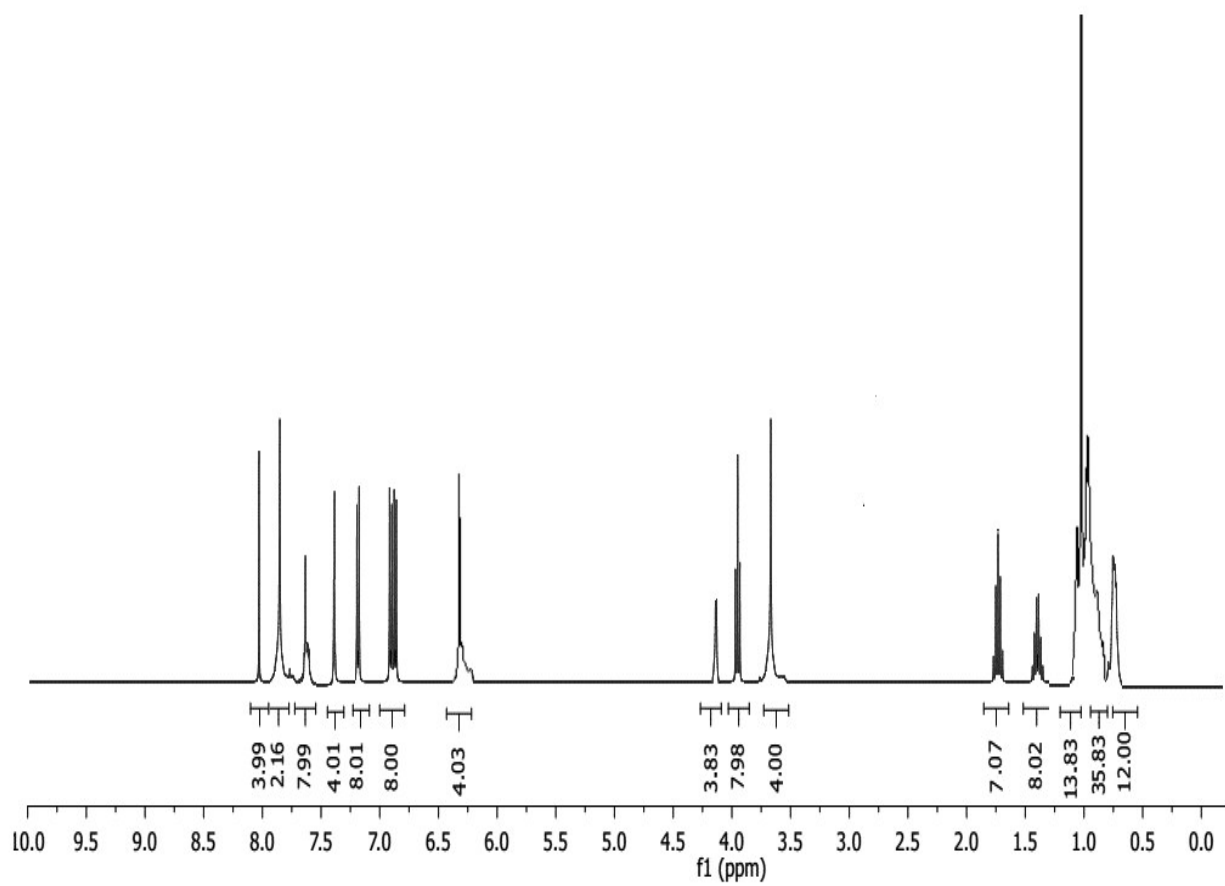

**Figure S<sub>11</sub>:** <sup>1</sup>H NMR of compound 1d<sub>5</sub>-l (series-1)

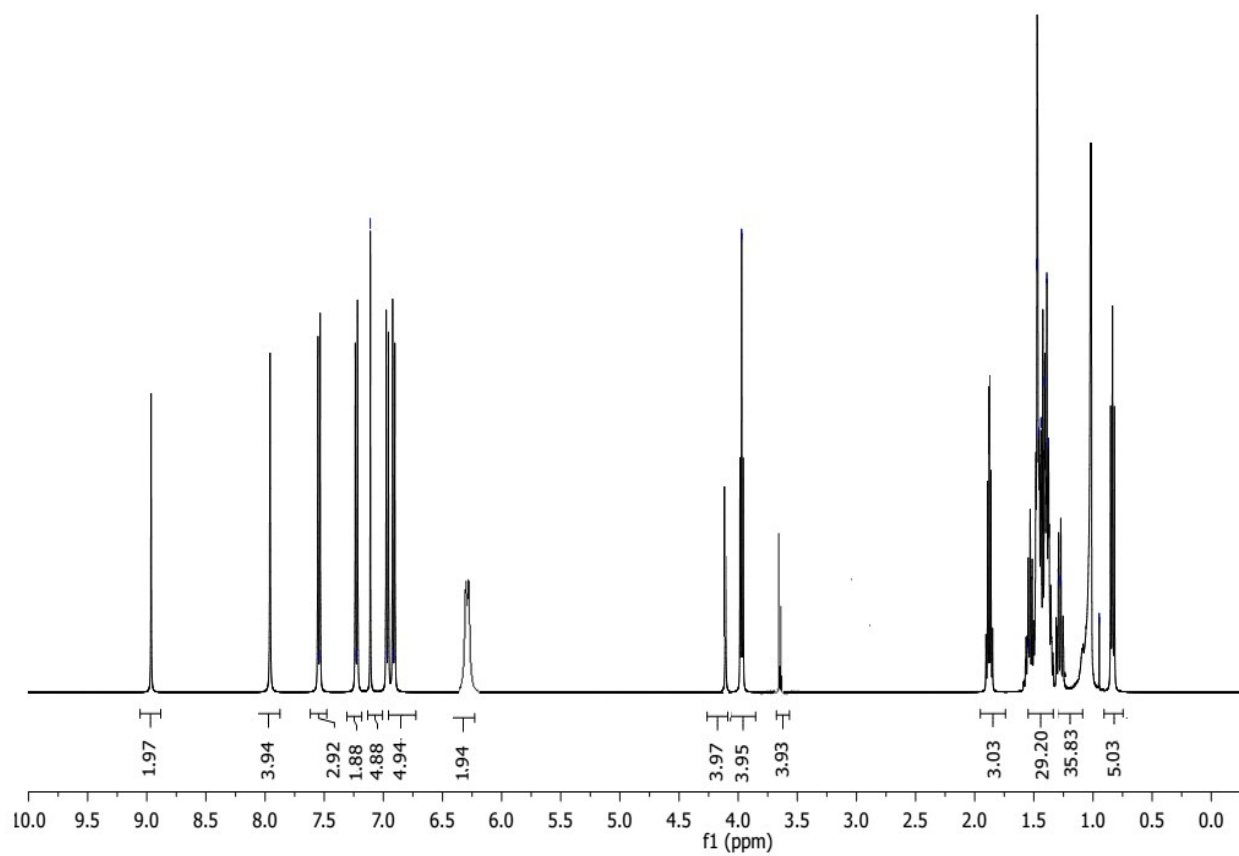

**Figure S<sub>12</sub>:** <sup>1</sup>H NMR of compound 1d<sub>12</sub>-II (series-2)



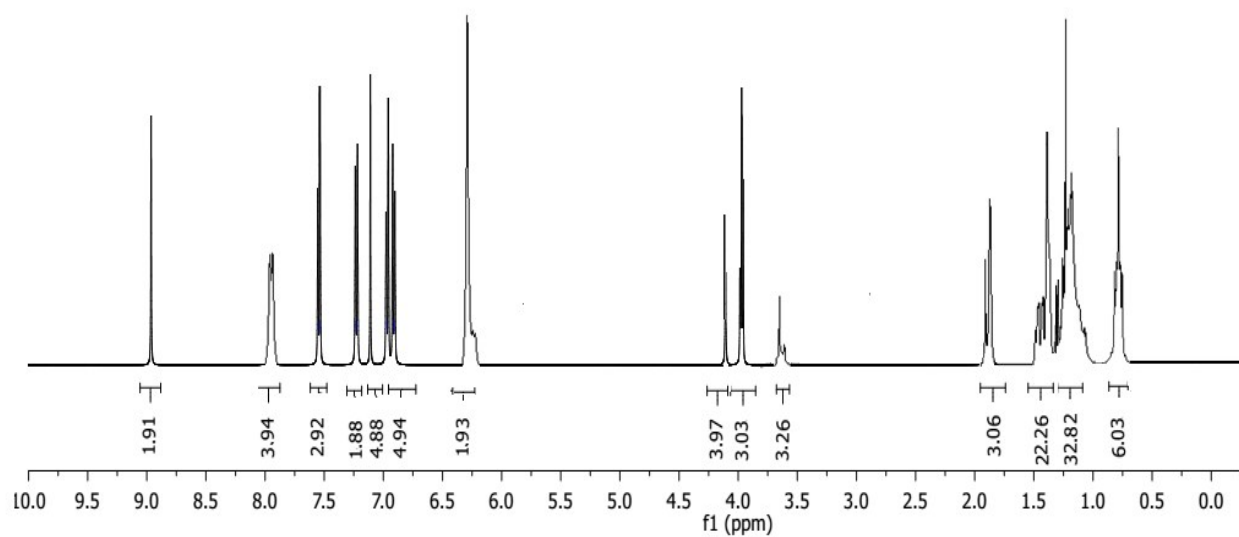

**Figure S<sub>13</sub>:** <sup>1</sup>H NMR of compound 1d<sub>10</sub>-II (series-2)

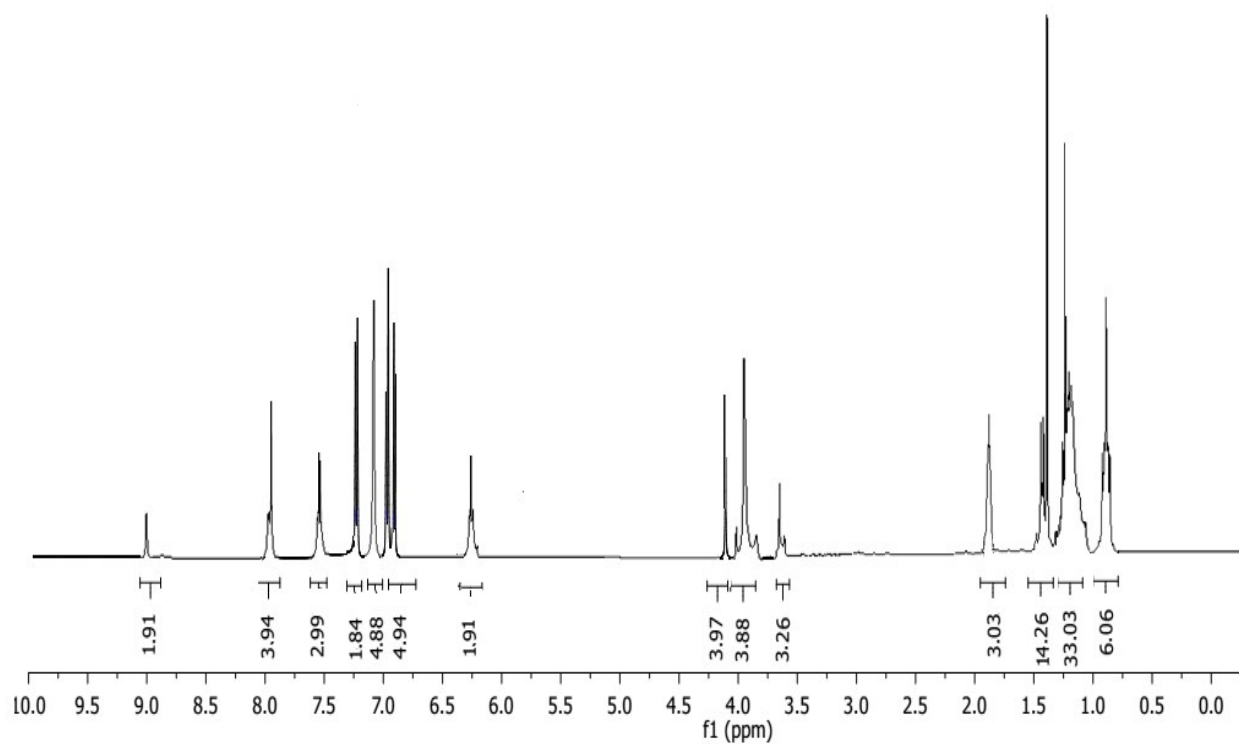

**Figure S<sub>14</sub>:** <sup>1</sup>H NMR of compound 1d<sub>8</sub>-11 (series-2)

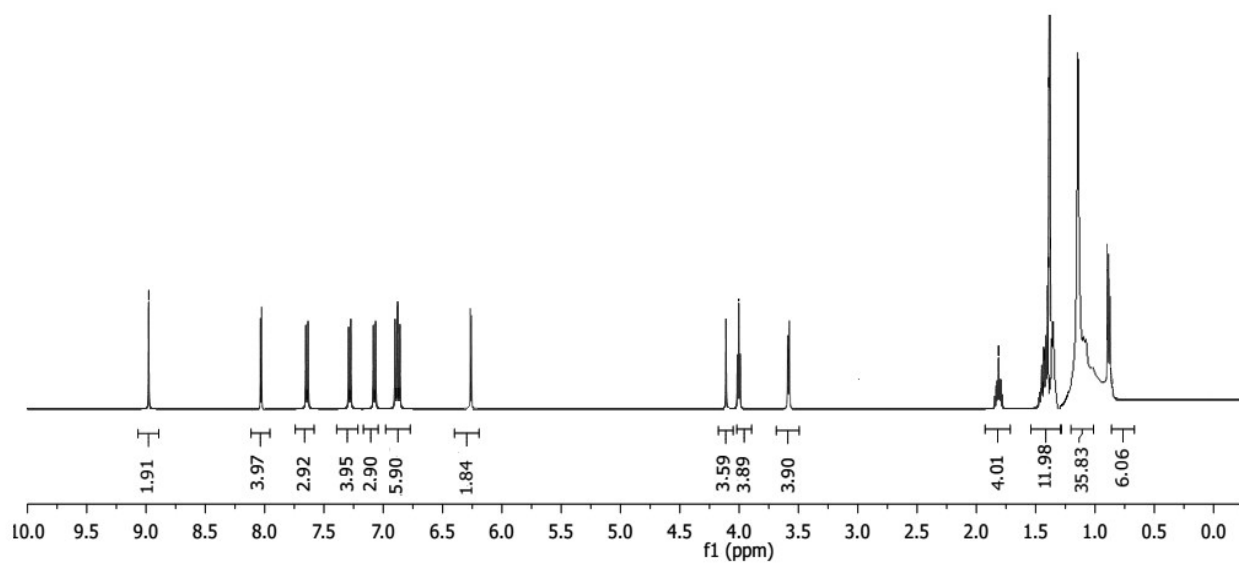

**Figure S<sub>15</sub>:** <sup>1</sup>H NMR of compound 1d<sub>5</sub>-1l (series-2)

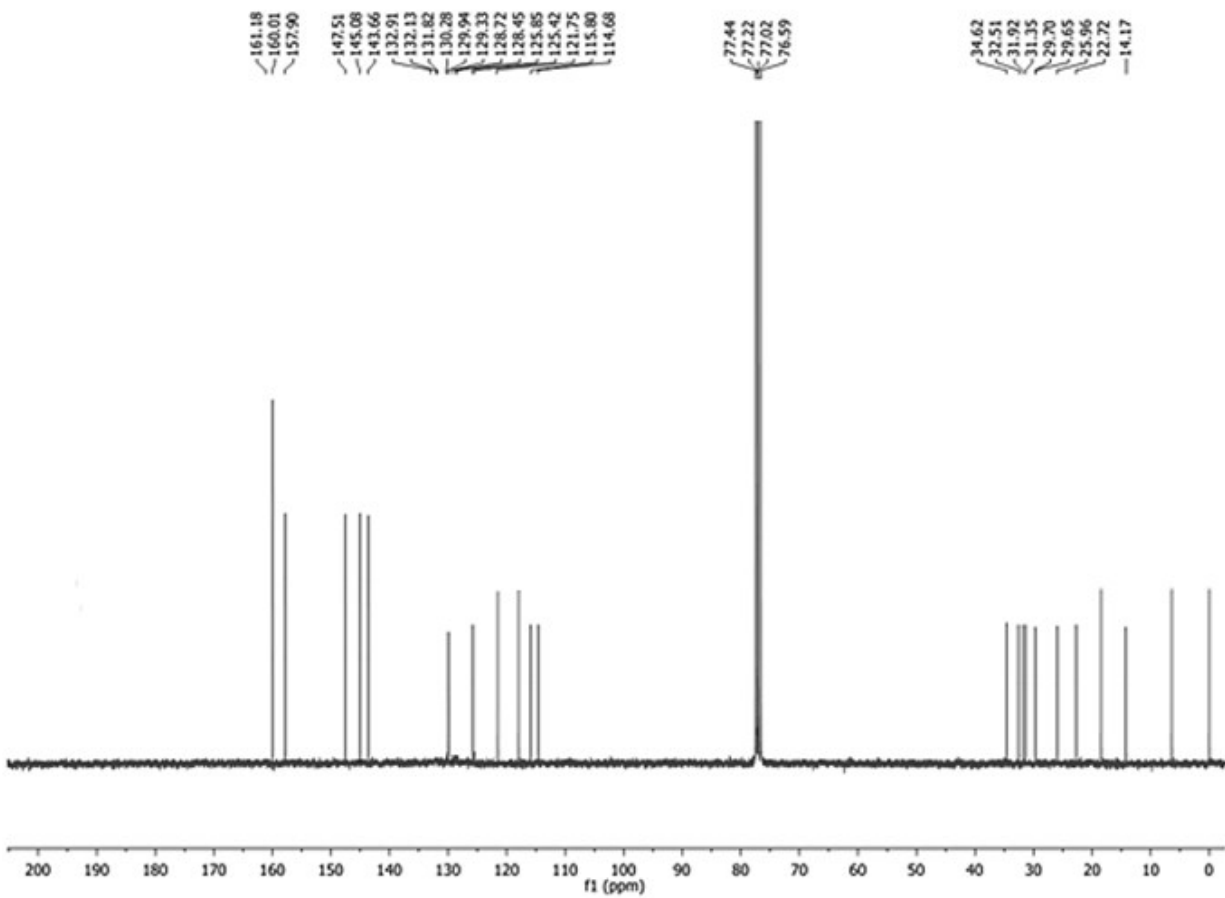

Figure S<sub>16</sub>:  $^{13}\text{C}$  NMR of compound 1d<sub>12</sub>-l (series-1)

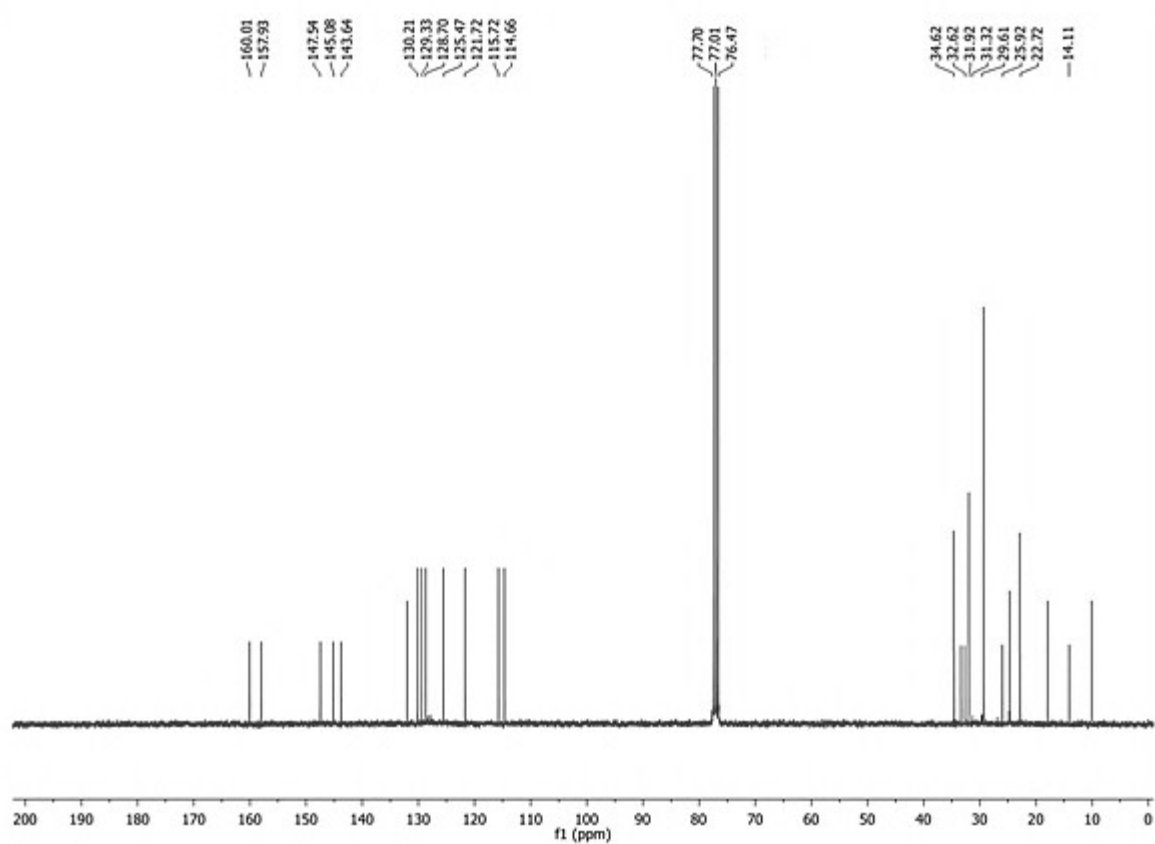

**Figure S<sub>17</sub>:**  $^{13}\text{C}$  NMR of compound 1d<sub>10</sub>-l (series-1)

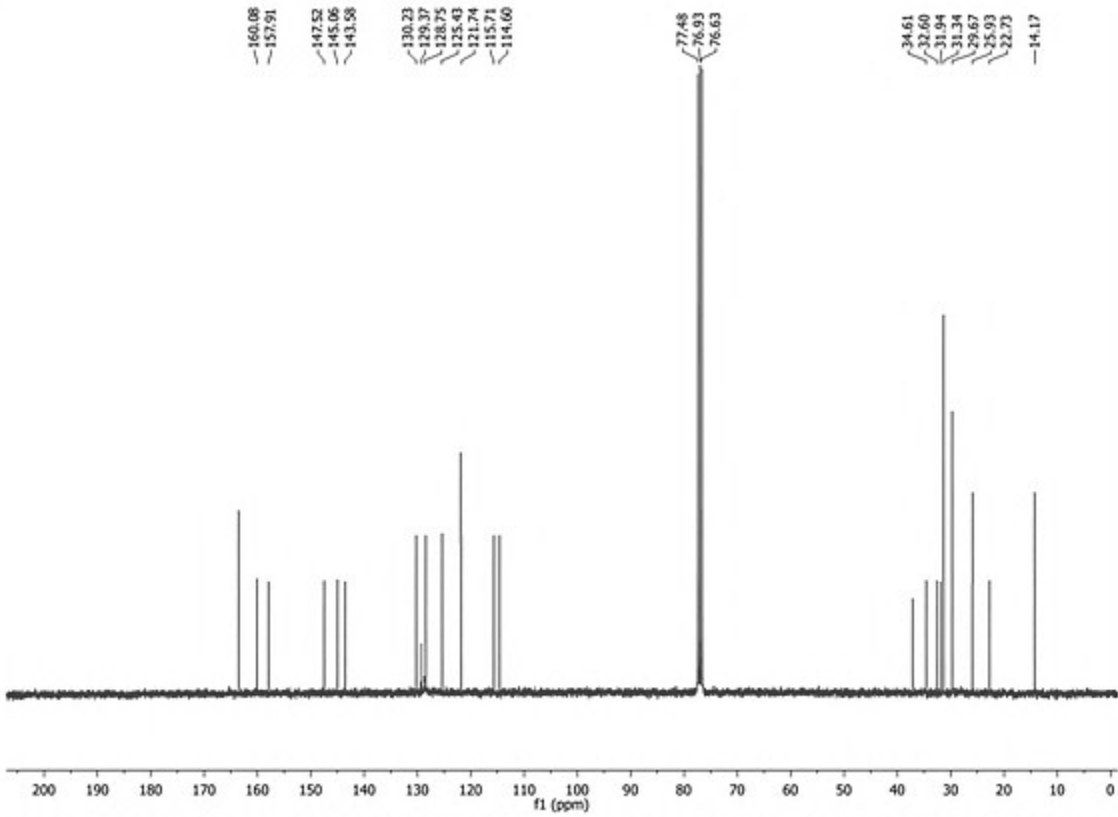

**Figure S<sub>18</sub>:** <sup>13</sup>C NMR of compound 1d<sub>8</sub>-l (series-1)

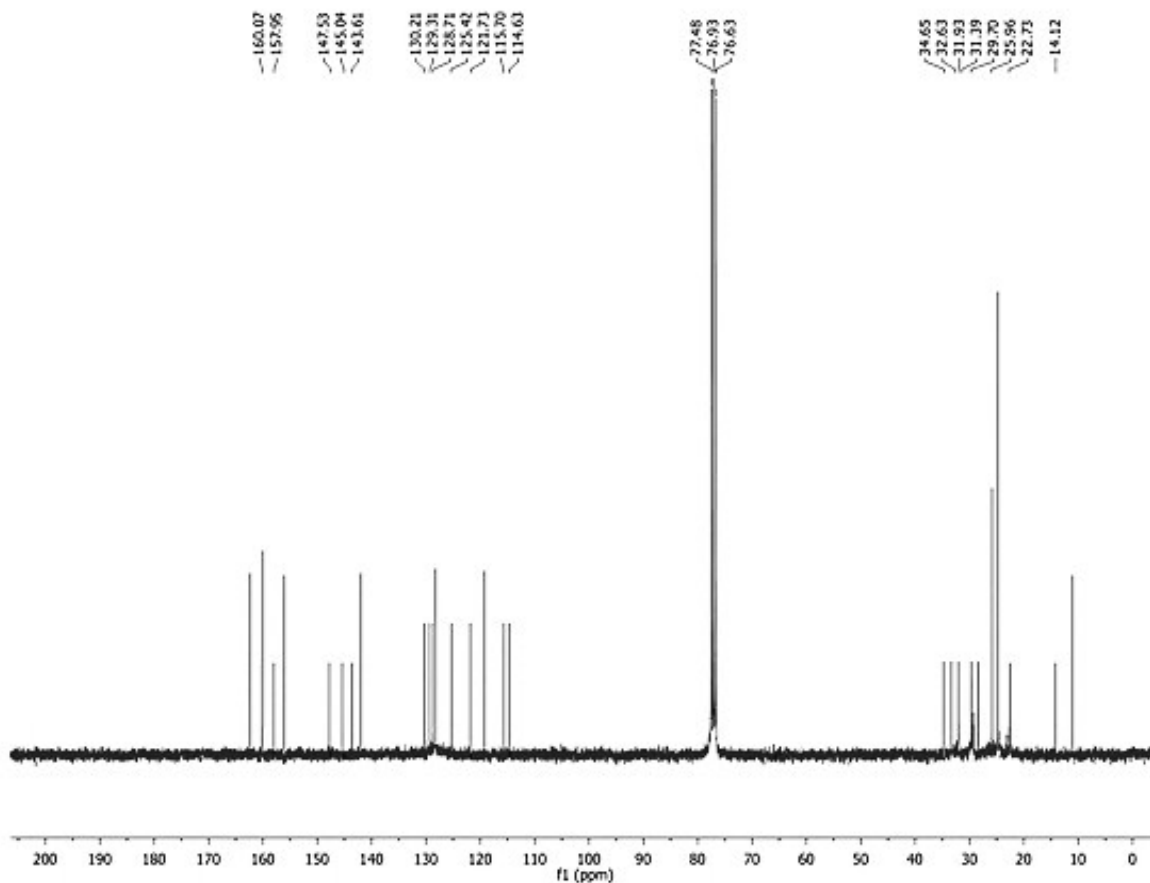

**Figure S19:**  $^{13}\text{C}$  NMR of compound 1d<sub>12</sub>-ll (series-2)

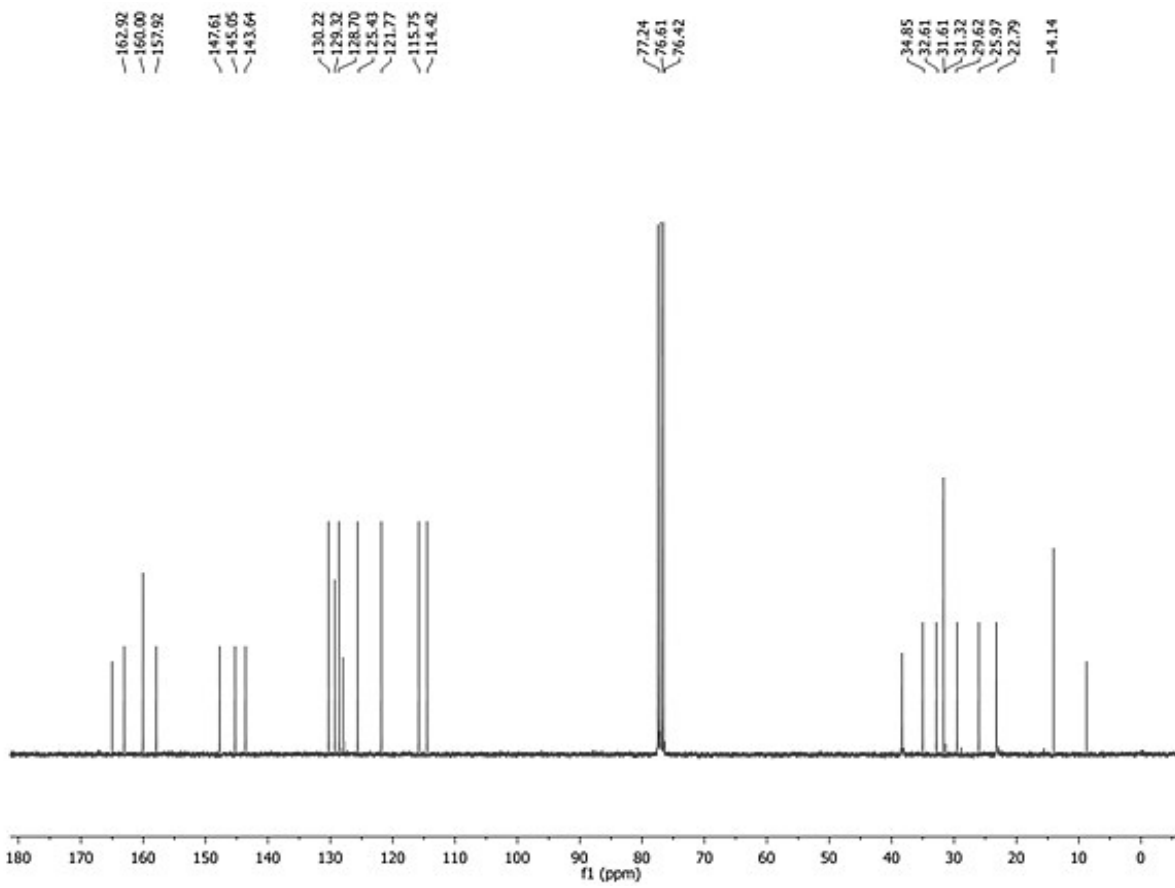

Figure S<sub>20</sub>: <sup>13</sup>C NMR of compound 1d<sub>10</sub>-II (series-2)



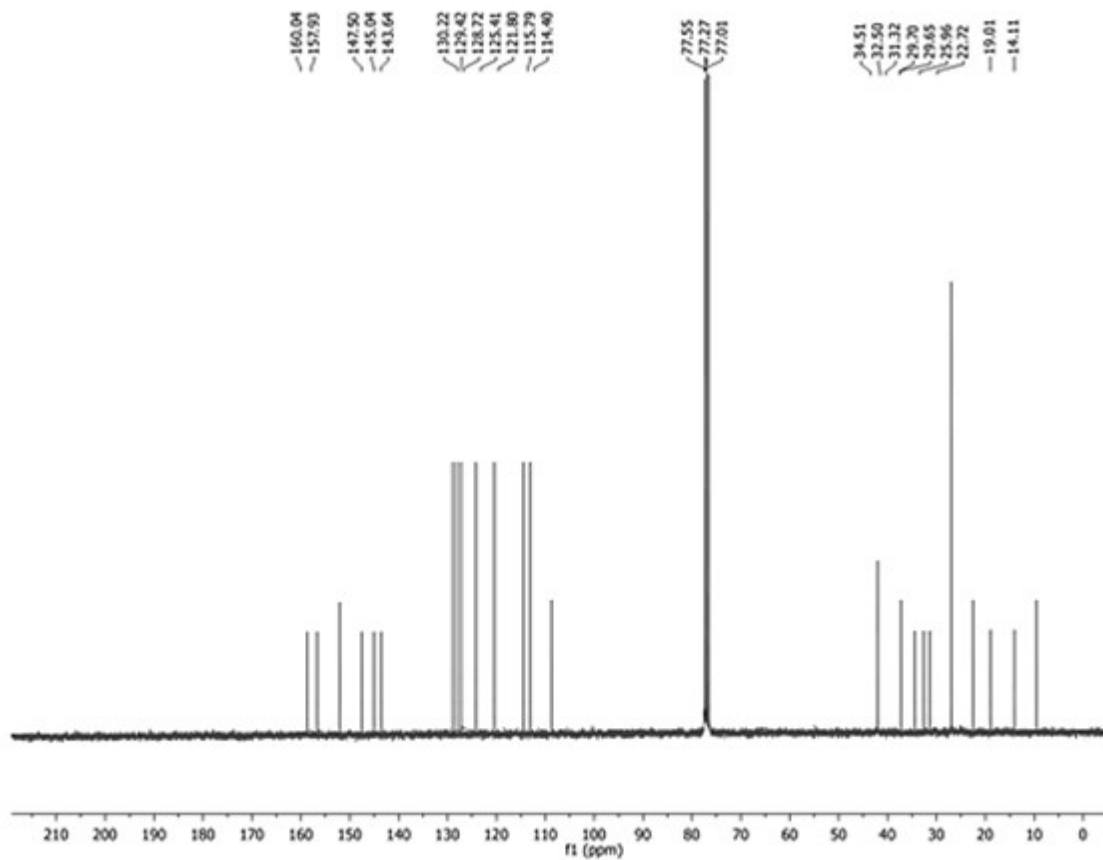

**Figure S<sub>21</sub>:** <sup>13</sup>C NMR of compound 1d<sub>8</sub>-ll (series-2)

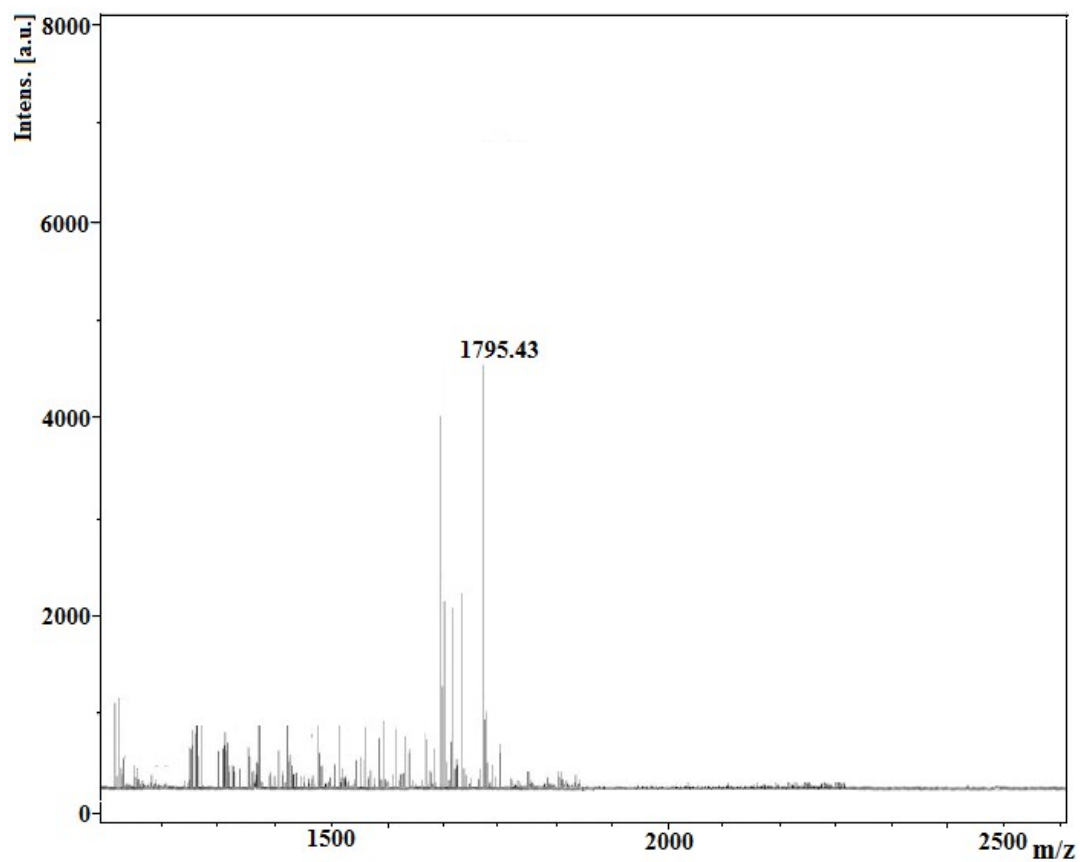

Figure S<sub>22</sub>: ESI Mass of compound <sup>1</sup>d<sub>10</sub>-1 (series-1)

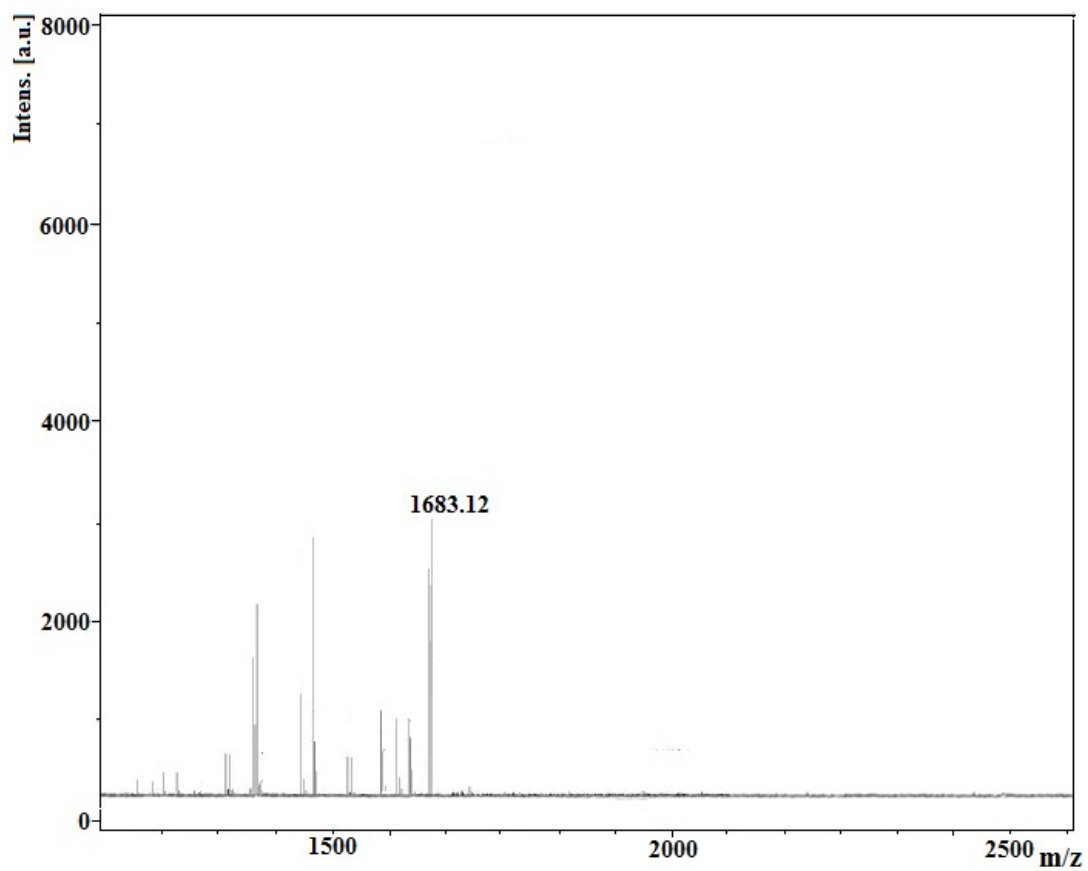

Figure S<sub>23</sub>: ESI Mass of compound <sup>1</sup>d<sub>8</sub>-l (series-1)

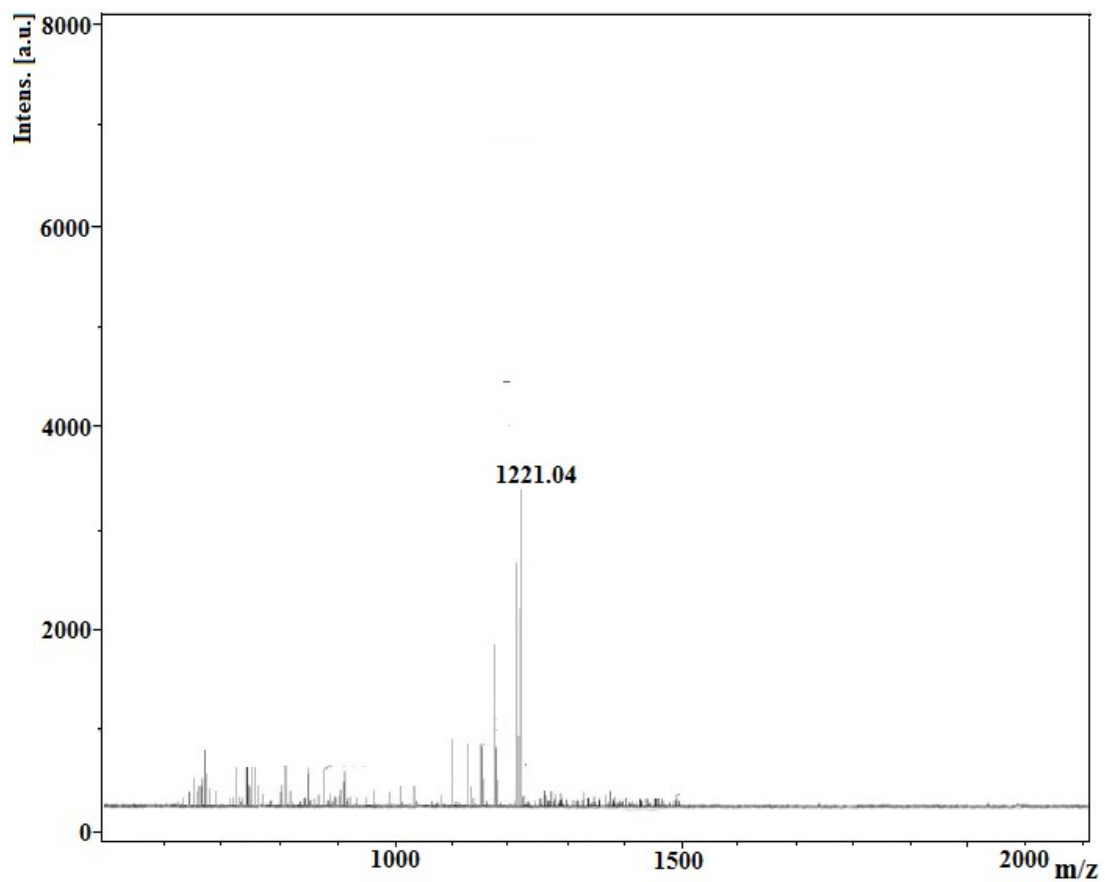

**Figure S<sub>24</sub>**: ESI Mass of compound <sup>1</sup>d<sub>10</sub>-II (series-2)

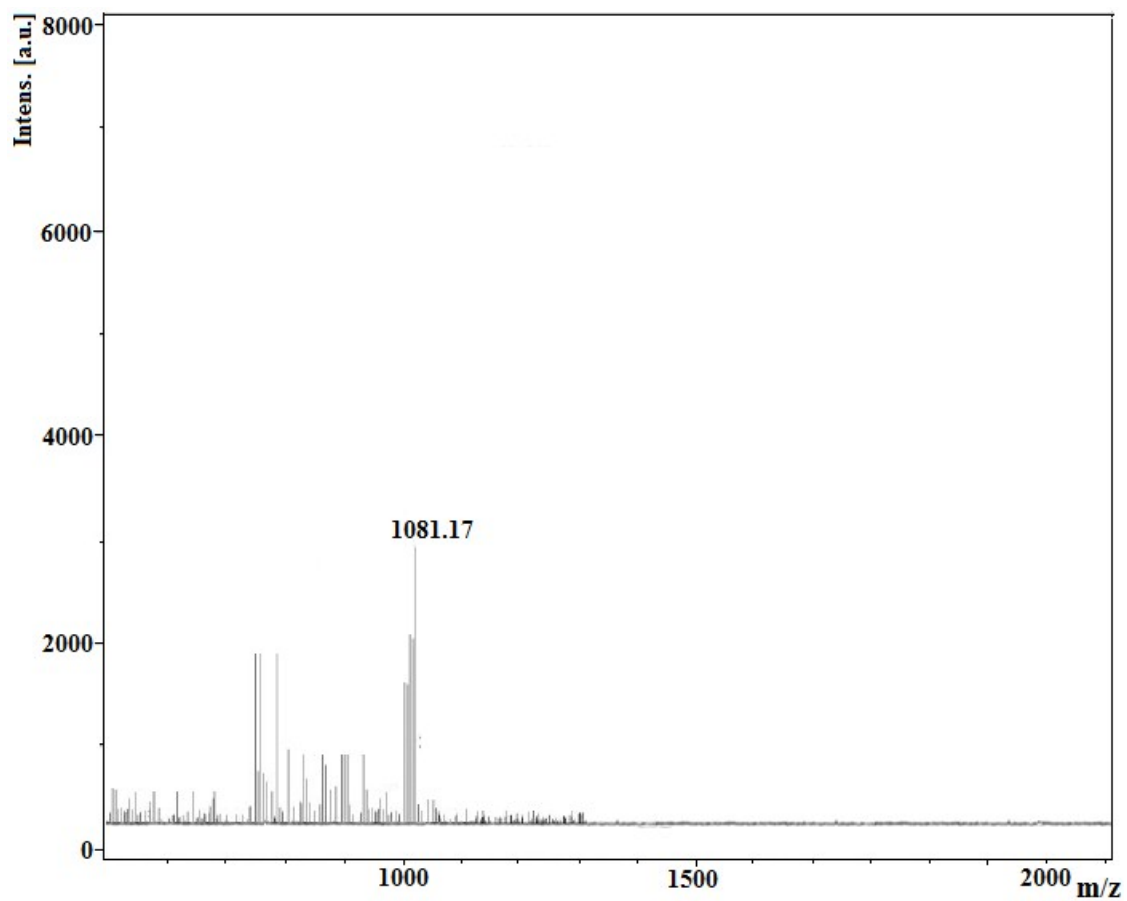

**Figure S<sub>25</sub>:** ESI Mass of compound <sup>1</sup>d<sub>5</sub>-II (series-2)

## References

1. A.Pandya, P.G.Sutariya, A.Lodha, S.K.Menon., *Nanoscale.*, **2013**, 5, 2364-2371.
2. A.Hasan, A.Abbas, M.N. Akhtar, *Molecule.*, **2011**, 16, 7789-7802.
3. (a) R.B.Patel, A.V.Doshi., *Der Pharma Chemica.*, **2011**, 3(1), 338-348; (b) V.S.Sharma, R.B.Patel., *Mol.Cryst.Liq.Cryst.*, **2017**, 643, 1-12; (c) G.Shanker, C.V.Yelamaggad, *New J.Chem.*, **2012**, 36, 918-926; (d) G.W.Gray, B.Jones., *J.Chem.Soc.*, **1954**, 1467-1470.
4. P.G.Suthariya, N.R.Modi, A.Pandya, V.A.Rana and S.K.Menon, *RSC Adv.* **2013**, 3, 4176-4180.
